# Supplementary material for: Left ventricular hypertrophy as a risk factor for accelerated brain aging: Results from the Study of Health in Pomerania
Source: PubMed Central journal article supplement — Hum Brain Mapp. 2024 Feb 23;45(3):e26567. doi: 10.1002/hbm.26567 (PMC10885183; doi:10.1002/hbm.26567), 2024-02-23
Supplement: HBM-45-e26567-s001.pdf [file HBM-45-e26567-s001.pdf]

# Supplementary Material

**Frenzel et al. “Left Ventricular Hypertrophy as a Risk Factor for Accelerated Brain Ageing: Results from the Study of Health in Pomerania”**

**Supplementary Text 1:** Data collection.

**Supplementary Figure 1:** Calibration of brain age scores.

**Supplementary Figure 2:** Prediction plots of inverse probability weighting (step 1).

**Supplementary Figure 3:** Prediction plots of inverse probability weighting (step 2).

**Supplementary Figure 4:** Sample weights.

**Supplementary Figure 5:** Values of Cook’s distance and DFBETA for model 1 of global cortical thickness.

**Supplementary Figure 6:** Point estimates of direct effects of LVMI on regional cortical thickness at follow-up (model 2).

**Supplementary Tables 1-8:** Analyses of variance (model 1-3).

**Supplementary Table 9:** Point estimates of direct effects of LVMI on regional cortical thicknesses at follow-up (model 2).

**Supplementary Tables 10-17:** Analyses of variance (model 1-3; complete case analyses).

## Supplementary Text 1 – Data Collection

Medical history and socio-demographic variables were assessed by standardized questionnaires during a computer-assisted face-to-face interview. Employment status was defined by four categories (0=unemployed; 1=student; 2=employed; 3=pensioner). Marital status was defined by 4 categories (1=single, living alone=1; 2=living together with partner; 3=divorced, living alone; 4=widows, living alone). Smoking status (0=never, 1=former, 2=current) and alcohol consumption (in g/d during last 30 days) were assessed based on questionnaires. Blood pressure (BP), body height, body weight, and waist circumference were measured during subsequent medical examinations. BP was measured three times from the right brachial artery after a 10-minute rest in a supine position and the average of the second and third measurement was considered. Pulse pressure was calculated as the difference between systolic and diastolic BP.

Hypertension was defined according ISH-WHO 1999 (1=either systolic BP  $\geq$  140mmHg, or diastolic BP  $\geq$  90mmHg, or intake of antihypertensive medications; 0=otherwise).

Diabetes (1=yes; 0=no) was defined either based on self-report, intake of anti-diabetic medication (anatomical-therapeutic-chemical [ATC] code A10), glycated hemoglobin  $\geq$  6.5% (International Expert Committee 2009), or blood glucose  $\geq$  11.1 mmol/l (IDF-WHO 2006).

Antihypertensive medication was defined by ATC codes C02A, C02CA, C03C, C03E, C04A, C07A, C08C, C08DA, C09AA, C09CA. Lipid-lowering medication was defined by ATC codes C10AA and C10AB.

Echocardiography, electrocardiography, and collection of blood samples were performed during the day of the interview. Blood samples were taken from the cubital vein of the fasting participants and analysed directly or stored at  $-80^{\circ}\text{C}$  in the Integrated Research Biobank of the University Medicine Greifswald <sup>1</sup>. Glomerular filtration rate was calculated from serum creatinine and cystatin c according to the CKD-EPI equation <sup>2</sup>.

Brain MRI was performed during a second visit with a median time interval of 15 days (max. 345 days). Follow-up examinations of similar extent were conducted about 7 years later (median 7.3 years; max. 10.2 years). Again, MRIs were performed during a second visit with a median time interval of 22 days (max. 750 days).

### **Electrocardiography**

A standard ten second twelve lead electrocardiography was conducted after resting for five minutes in supine position. Electrocardiograms were analyzed using the analysis system MEANS<sup>3</sup>.

### **Brain MRI**

T<sub>1</sub>-weighted and T<sub>2</sub>-weighted fluid-attenuated inversion recovery (FLAIR) scans of the brain were obtained using a 1.5T Siemens Magnetom Avanto scanner (Siemens Healthineers, Erlangen, Germany)<sup>4,5</sup>. The following parameters were used: T<sub>1</sub>: orientation=axial plane, TR=1,900ms, TE=3.37ms, flip angle 15°, slice thickness=1mm, and resolution 1mm x 1mm, FLAIR: orientation=axial plane, TR=5,000ms, TE=325ms, slice thickness=3mm, and resolution 0.9mm × 0.9mm.

1. Winter T, Friedrich N, Lamp S, Schäfer C, Schattschneider M, Bollmann S, Brümmer D, Riemann K, Petersmann A, Nauck M. The Integrated Research Biobank of the University Medicine Greifswald. **Open Journal of Bioresources**. 2020; 7:2.
2. Inker LA, Schmid CH, Tighiouart H, Eckfeldt JH, Feldman HI, Greene T, Kusek JW, Manzi J, Van Lente F, Zhang YL, et al. Estimating Glomerular Filtration Rate from Serum Creatinine and Cystatin C. **N Engl J Med**. 2012; 367:20–29.
3. van Bommel JH, Kors JA, van Herpen G. Methodology of the modular ECG analysis system MEANS. **Methods Inf Med**. 1990; 29:346–353.
4. Hegenscheid K, Kühn JP, Völzke H, Biffar R, Hosten N, Puls R. Whole-body magnetic resonance imaging of healthy volunteers: pilot study results from the population-based SHIP study. **Rofo**. 2009; 181:748–759.
5. Hosten N, Bülow R, Völzke H, Domin M, Schmidt CO, Teumer A, Ittermann T, Nauck M, Felix S, Dörr M, et al. SHIP-MR and Radiology: 12 Years of Whole-Body Magnetic Resonance Imaging in a Single Center. **Healthcare**. 2022; 10:33.

### Supplementary Figure 1 – Calibration of Brain Age Scores

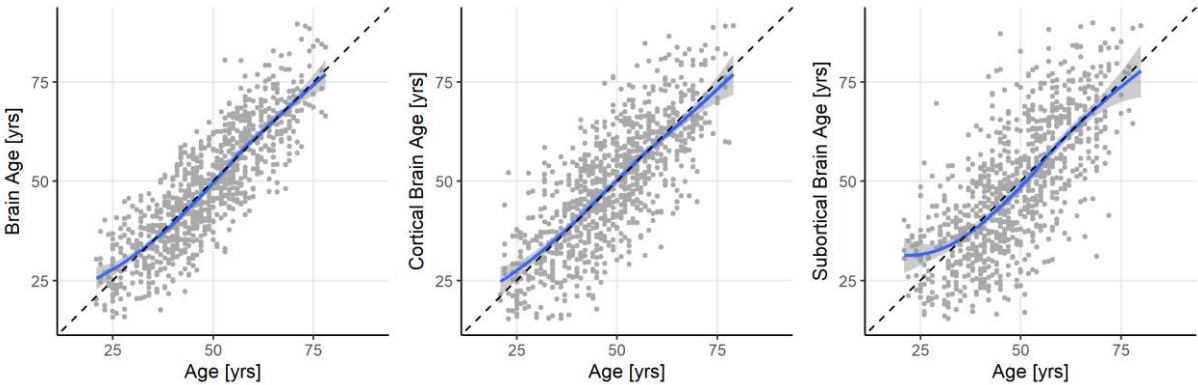

*Supplementary Figure 1: Estimated brain age scores at baseline versus chronological age at baseline (n=926).*

## Supplementary Figure 2 – Inverse Probability Weighting (Step 1)

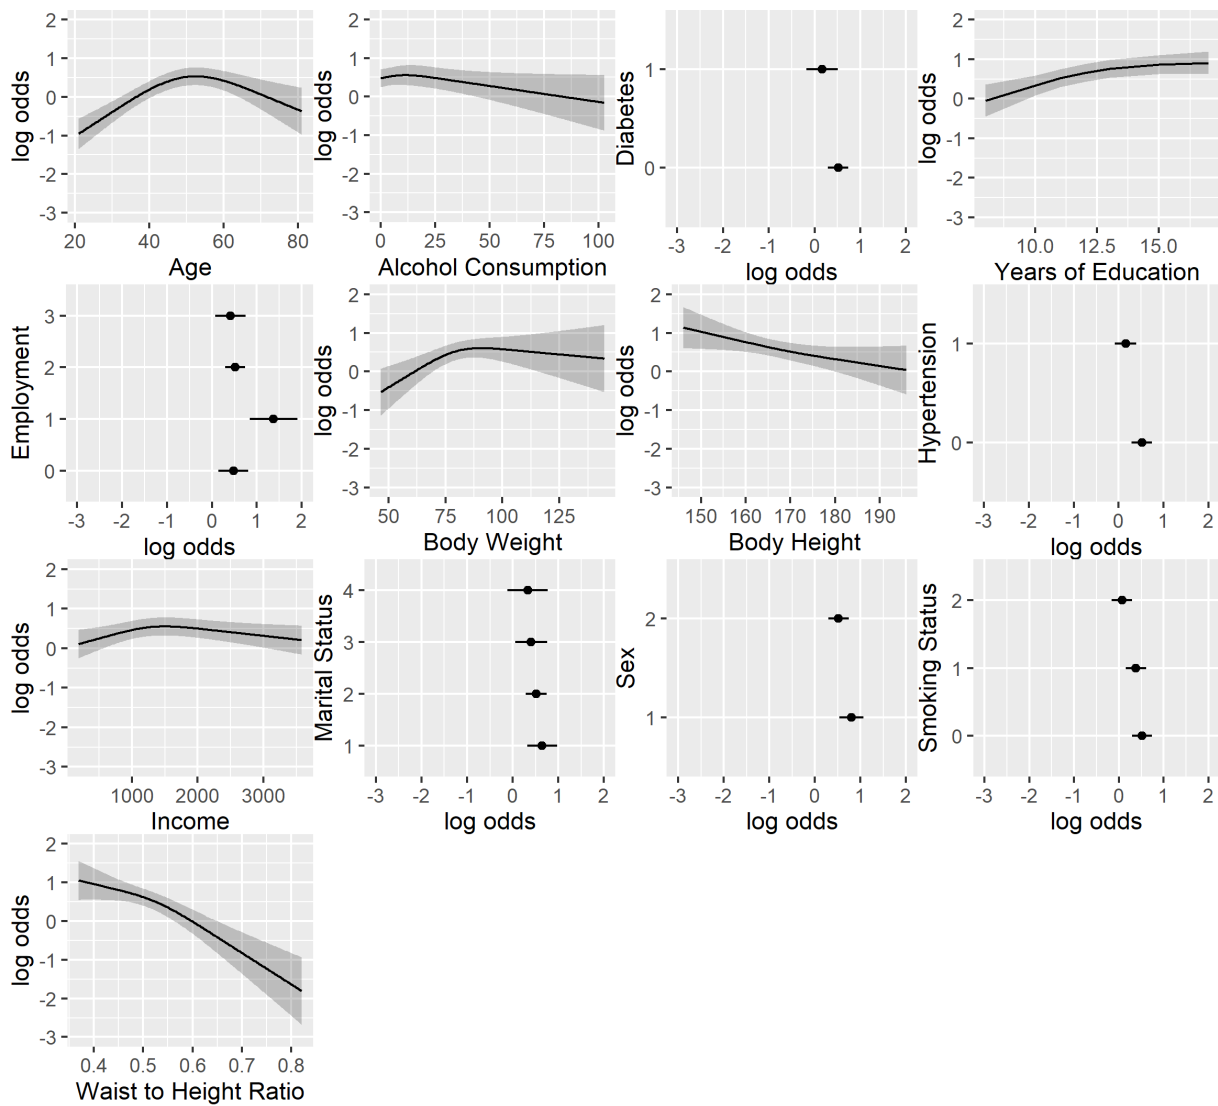

**Supplementary Figure 2:** For participants without history of myocardial infarction or stroke, availability of echocardiography and brain MRI at baseline was modelled by logistic regressions on baseline values of socio-demographic variables, smoking status, alcohol consumption, diabetes, hypertension, and waist-to-height ratio (AUC=0.680).

### Supplementary Figure 3 – Inverse Probability Weighting (Step 2)

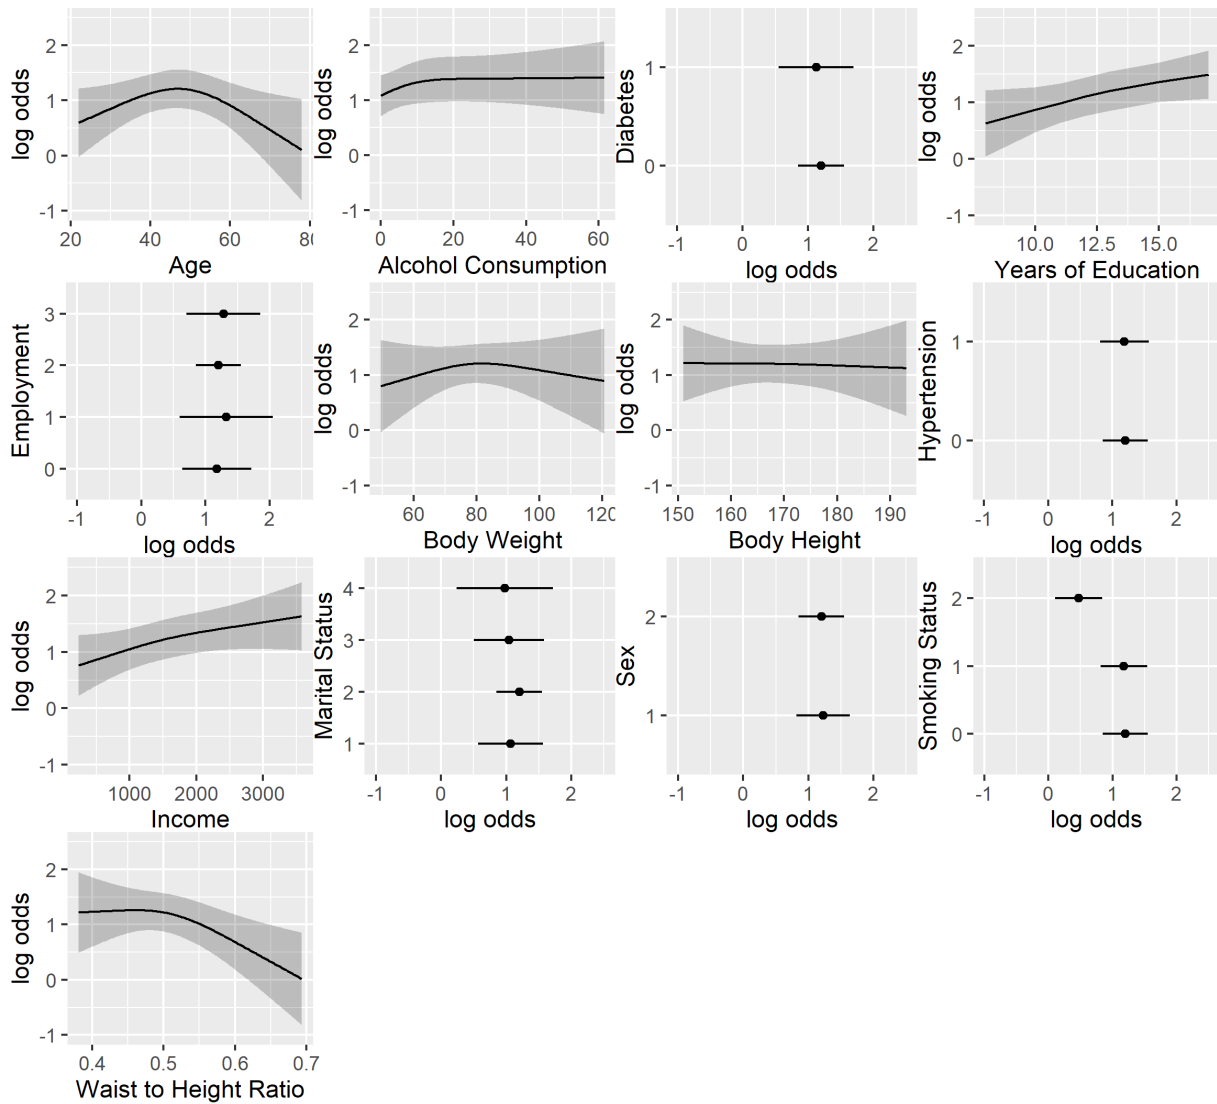

**Supplementary Figure 3:** For participants who underwent echocardiography and brain MRI at baseline, availability of brain MRI at the follow-up was modelled by logistic regressions on baseline values of socio-demographic variables, smoking status, alcohol consumption, diabetes, hypertension, and waist-to-height ratio (AUC=0.681).

## Supplementary Figure 4

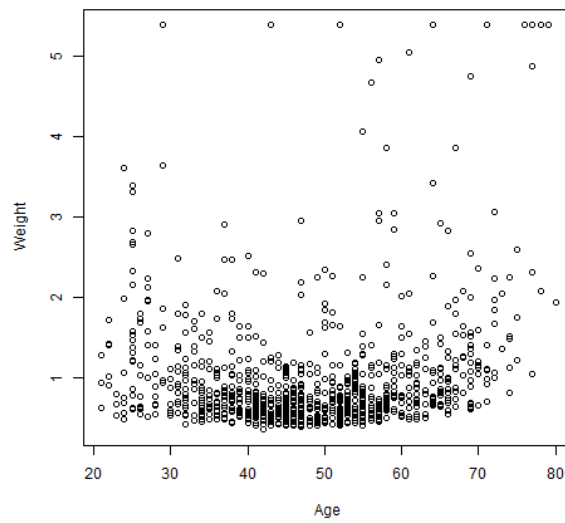

*Supplementary Figure 4: Sample weights used in the regression analyses. 10 cases were trimmed down to the 99% quantile of 5.3.*

## Supplementary Figure 5

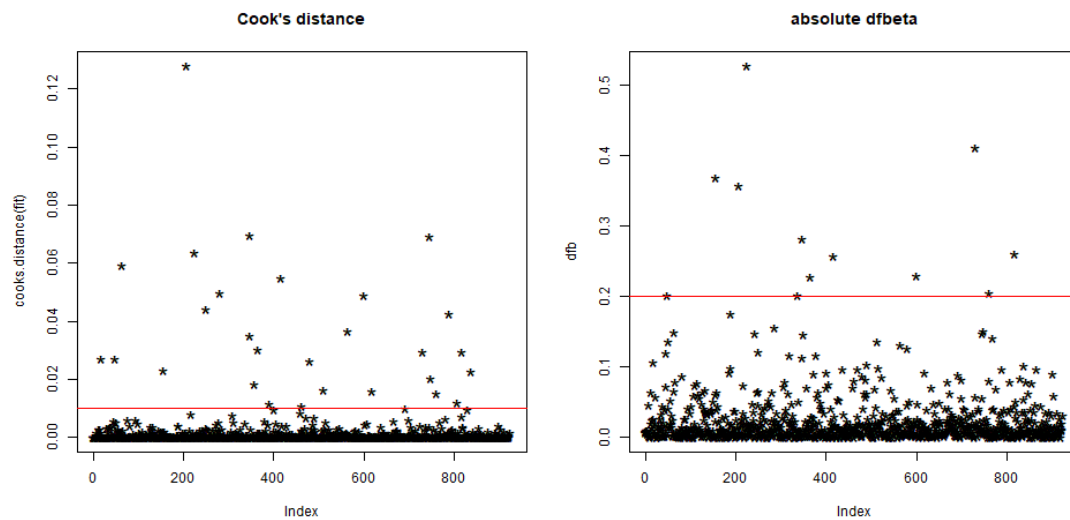

*Supplementary Figure 5: Values of Cook's distance (left) and absolute values of DFBETA (right) for the base model (model 1) of global cortical thickness. Highly influential points were defined by the thresholds 0.01 and 0.2, respectively (indicated by red lines), and were excluded from the analyses ( $n=29$ ).*

## Supplementary Figure 6

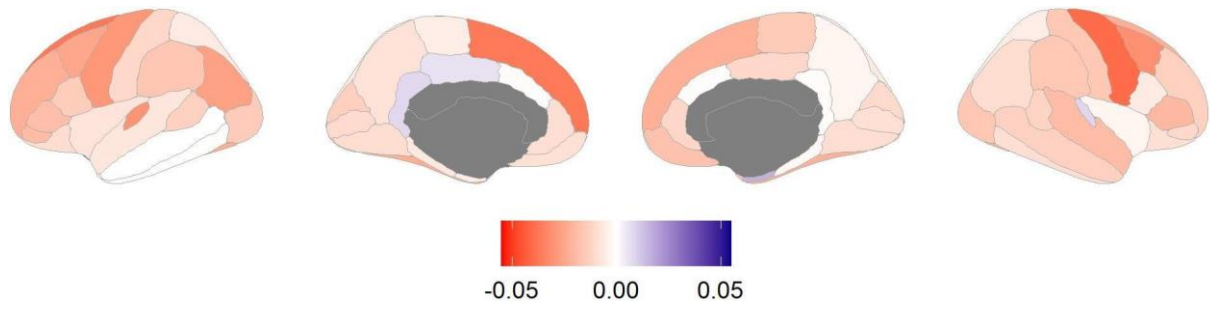

*Supplementary Figure 6: Point estimates of direct effects of left ventricular mass index on regional cortical thickness at follow-up. Effects adjusted for socio-demographic factors, anthropometric variables, lifestyle factors, cardiovascular risk factors and medication, follow-up time, and baseline value of the outcome (model 2).*



## Supplementary Table 1 – Total Brain Volume

| Variable                                           | model 1 (n=891) |              |             |            |               | model 2 (n=885) |             |            |               | model 3 (n=885) |             |            |               |
|----------------------------------------------------|-----------------|--------------|-------------|------------|---------------|-----------------|-------------|------------|---------------|-----------------|-------------|------------|---------------|
|                                                    | df              | SS           | MS          | F          | P             | SS              | MS          | F          | P             | SS              | MS          | F          | P             |
| Time interval                                      | 2               | 1579.3       | 789.6       | 7.5        | 0.0006        | 1585.2          | 792.6       | 7.7        | 0.0005        | 1784.5          | 892.3       | 8.7        | 0.0002        |
| Baseline value of outcome                          | 2               | 1311559      | 655779.5    | 6231.7     | < 0.0001      | 1367375         | 683687.3    | 6629.9     | < 0.0001      | 1375806         | 687903.1    | 6689       | < 0.0001      |
| Age                                                | 4               | 24065.5      | 6016.4      | 57.2       | < 0.0001      | 18926.6         | 4731.7      | 45.9       | < 0.0001      | 20877.8         | 5219.5      | 50.8       | < 0.0001      |
| Sex                                                | 3               | 2823.9       | 941.3       | 8.9        | < 0.0001      | 3011.2          | 1003.7      | 9.7        | < 0.0001      | 2850.2          | 950.1       | 9.2        | < 0.0001      |
| Age * Sex                                          | 2               | 2821.2       | 1410.6      | 13.4       | < 0.0001      | 3011            | 1505.5      | 14.6       | < 0.0001      | 2849.9          | 1425        | 13.9       | < 0.0001      |
| Intracranial Volume                                | 2               | 302.1        | 151.1       | 1.4        | 0.2386        | 160.5           | 80.2        | 0.8        | 0.4596        | 309.9           | 154.9       | 1.5        | 0.2223        |
| Body height                                        | 2               | 1047.6       | 523.8       | 5          | 0.0071        | 1382.2          | 691.1       | 6.7        | 0.0013        | 1138            | 569         | 5.5        | 0.0041        |
| Body weight                                        | 2               | 154          | 77          | 0.7        | 0.4815        | 197.4           | 98.7        | 1          | 0.3844        | 206.5           | 103.2       | 1          | 0.3669        |
| Years of education                                 | 2               | 170.5        | 85.3        | 0.8        | 0.4451        | 143.9           | 72          | 0.7        | 0.4979        | 91.9            | 45.9        | 0.4        | 0.6398        |
| Employment                                         | 3               | 154.2        | 51.4        | 0.5        | 0.6903        | 400.9           | 133.6       | 1.3        | 0.2746        | 439.9           | 146.6       | 1.4        | 0.2338        |
| Income                                             | 2               | 535.4        | 267.7       | 2.5        | 0.0792        | 536.8           | 268.4       | 2.6        | 0.0747        | 399.5           | 199.8       | 1.9        | 0.144         |
| Marital status                                     | 3               | 1470.4       | 490.1       | 4.7        | 0.0031        | 2244            | 748         | 7.3        | < 0.0001      | 2156.6          | 718.9       | 7          | 0.0001        |
| Smoking status                                     | 2               | 587.2        | 293.6       | 2.8        | 0.062         | 772.7           | 386.4       | 3.7        | 0.024         | 537             | 268.5       | 2.6        | 0.0741        |
| Alcohol consumption                                | 2               | 165.9        | 83          | 0.8        | 0.4549        | 230.9           | 115.5       | 1.1        | 0.3269        | 403.7           | 201.8       | 2          | 0.1412        |
| <b>Left Ventricular Mass Index</b>                 | <b>2</b>        | <b>191.3</b> | <b>95.7</b> | <b>0.9</b> | <b>0.4033</b> | <b>62.8</b>     | <b>31.4</b> | <b>0.3</b> | <b>0.7376</b> | <b>186.3</b>    | <b>93.2</b> | <b>0.9</b> | <b>0.4046</b> |
| Diabetes                                           | 1               |              |             |            |               | 278.1           | 278.1       | 2.7        | 0.1009        | 436.1           | 436.1       | 4.2        | 0.0398        |
| Hypertension                                       | 1               |              |             |            |               | 39.8            | 39.8        | 0.4        | 0.5346        | 1.3             | 1.3         | 0          | 0.912         |
| Waist to height ratio                              | 2               |              |             |            |               | 691             | 345.5       | 3.4        | 0.0355        | 776.4           | 388.2       | 3.8        | 0.0233        |
| Cholesterol ratio                                  | 4               |              |             |            |               | 126.8           | 31.7        | 0.3        | 0.8731        | 101.4           | 25.4        | 0.2        | 0.9118        |
| Intake of lipid-lowering drugs                     | 3               |              |             |            |               | 93.8            | 31.3        | 0.3        | 0.8231        | 53.1            | 17.7        | 0.2        | 0.9153        |
| Intake of antihypertensive drugs                   | 5               |              |             |            |               | 2239.4          | 447.9       | 4.3        | 0.0007        | 2030            | 406         | 3.9        | 0.0015        |
| Pulse pressure                                     | 4               |              |             |            |               | 526.2           | 131.6       | 1.3        | 0.2779        | 479.8           | 120         | 1.2        | 0.3242        |
| Diastolic BP                                       | 4               |              |             |            |               | 1886.6          | 471.7       | 4.6        | 0.0012        | 1773.3          | 443.3       | 4.3        | 0.0019        |
| Cholesterol ratio * Intake of lipid-lowering drugs | 2               |              |             |            |               | 64.6            | 32.3        | 0.3        | 0.7313        | 48.4            | 24.2        | 0.2        | 0.7902        |
| Pulse pressure * Intake of antihypertensive drugs  | 2               |              |             |            |               | 276.1           | 138         | 1.3        | 0.2628        | 171.4           | 85.7        | 0.8        | 0.435         |
| Diastolic BP * Intake of antihypertensive drugs    | 2               |              |             |            |               | 1790.3          | 895.1       | 8.7        | 0.0002        | 1644.1          | 822         | 8          | 0.0004        |
| E/e'                                               | 2               |              |             |            |               |                 |             |            |               | 173.5           | 86.7        | 0.8        | 0.4306        |
| E/A                                                | 2               |              |             |            |               |                 |             |            |               | 546.3           | 273.2       | 2.7        | 0.0708        |
| Left atrial size index                             | 2               |              |             |            |               |                 |             |            |               | 99.4            | 49.7        | 0.5        | 0.6168        |
| Total                                              | Σdf             | 17332425     | 559110.5    | 5313.1     | < 0.0001      | 17780075        | 362858.7    | 3518.8     | < 0.0001      | 18602175        | 338221.4    | 3288.8     | < 0.0001      |
| Error                                              | n-Σdf           | 90395.2      | 105.2       |            |               | 86106.1         | 103.1       |            |               | 85255           | 102.8       |            |               |

*Supplementary Table 1: Analyses of variance of model 1, 2, and 3 of total brain volume (imputed analyses). Tests included all interaction terms of the corresponding factor. E/A - ratio of early and late mitral inflow velocities in diastole. E/e' - ratio of early mitral inflow velocity and early mitral annular velocity in diastole.*

## Supplementary Table 2 – Subcortical Gray Matter Volume

| Variable                                           | df       | model 1 (n=891) |            |            |               | model 2 (n=885) |            |            |               | model 3 (n=885) |          |          |               |
|----------------------------------------------------|----------|-----------------|------------|------------|---------------|-----------------|------------|------------|---------------|-----------------|----------|----------|---------------|
|                                                    |          | SS              | MS         | F          | P             | SS              | MS         | F          | P             | SS              | MS       | F        | P             |
| Time interval                                      | 2        | 8.2             | 4.1        | 7.3        | 0.0007        | 8.9             | 4.4        | 8.3        | 0.0003        | 9.5             | 4.7      | 8.9      | 0.0001        |
| Baseline value of outcome                          | 2        | 7562            | 3781       | 6686.2     | < 0.0001      | 7011.8          | 3505.9     | 6584.8     | < 0.0001      | 7125.1          | 3562.6   | 6691.5   | < 0.0001      |
| Age                                                | 4        | 84.7            | 21.2       | 37.4       | < 0.0001      | 71              | 17.7       | 33.3       | < 0.0001      | 58.1            | 14.5     | 27.3     | < 0.0001      |
| Sex                                                | 3        | 3.8             | 1.3        | 2.2        | 0.0816        | 3.8             | 1.3        | 2.4        | 0.0687        | 4               | 1.3      | 2.5      | 0.0587        |
| Age * Sex                                          | 2        | 3.7             | 1.8        | 3.2        | 0.0399        | 3.7             | 1.9        | 3.5        | 0.0304        | 3.7             | 1.9      | 3.5      | 0.0305        |
| Intracranial Volume                                | 2        | 6               | 3          | 5.3        | 0.005         | 5.1             | 2.6        | 4.8        | 0.0083        | 5.3             | 2.7      | 5        | 0.007         |
| Body height                                        | 2        | 0               | 0          | 0          | 0.9867        | 0.1             | 0.1        | 0.1        | 0.9069        | 0.1             | 0        | 0.1      | 0.926         |
| Body weight                                        | 2        | 2.9             | 1.5        | 2.6        | 0.0749        | 2.5             | 1.2        | 2.3        | 0.0969        | 1.6             | 0.8      | 1.5      | 0.2223        |
| Years of education                                 | 2        | 0.2             | 0.1        | 0.2        | 0.8116        | 0.1             | 0          | 0.1        | 0.9168        | 0.1             | 0.1      | 0.1      | 0.8803        |
| Employment                                         | 3        | 2.2             | 0.7        | 1.3        | 0.2683        | 0.9             | 0.3        | 0.6        | 0.6416        | 0.8             | 0.3      | 0.5      | 0.6746        |
| Income                                             | 2        | 1.1             | 0.5        | 1          | 0.3824        | 0.8             | 0.4        | 0.7        | 0.483         | 0.5             | 0.2      | 0.4      | 0.6493        |
| Marital status                                     | 3        | 14.3            | 4.8        | 8.4        | < 0.0001      | 11.7            | 3.9        | 7.3        | < 0.0001      | 8.4             | 2.8      | 5.2      | 0.0014        |
| Smoking status                                     | 2        | 5               | 2.5        | 4.4        | 0.0123        | 4.4             | 2.2        | 4.1        | 0.0162        | 4               | 2        | 3.7      | 0.0242        |
| Alcohol consumption                                | 2        | 4.9             | 2.5        | 4.4        | 0.013         | 2.7             | 1.4        | 2.5        | 0.0792        | 3.5             | 1.8      | 3.3      | 0.0373        |
| <b>Left Ventricular Mass Index</b>                 | <b>2</b> | <b>0.4</b>      | <b>0.2</b> | <b>0.4</b> | <b>0.6758</b> | <b>0.3</b>      | <b>0.1</b> | <b>0.2</b> | <b>0.7847</b> | <b>0</b>        | <b>0</b> | <b>0</b> | <b>0.9706</b> |
| Diabetes                                           | 1        |                 |            |            |               | 0.1             | 0.1        | 0.1        | 0.7401        | 0               | 0        | 0        | 0.9523        |
| Hypertension                                       | 1        |                 |            |            |               | 0.5             | 0.5        | 1          | 0.3234        | 0.5             | 0.5      | 0.9      | 0.354         |
| Waist to height ratio                              | 2        |                 |            |            |               | 2.3             | 1.2        | 2.2        | 0.1147        | 1.3             | 0.7      | 1.2      | 0.2929        |
| Cholesterol ratio                                  | 4        |                 |            |            |               | 1.5             | 0.4        | 0.7        | 0.5945        | 2.9             | 0.7      | 1.4      | 0.2432        |
| Intake of lipid-lowering drugs                     | 3        |                 |            |            |               | 1.3             | 0.4        | 0.8        | 0.5018        | 2               | 0.7      | 1.2      | 0.301         |
| Intake of antihypertensive drugs                   | 5        |                 |            |            |               | 3.9             | 0.8        | 1.5        | 0.2031        | 3.9             | 0.8      | 1.5      | 0.1968        |
| Pulse pressure                                     | 4        |                 |            |            |               | 4.4             | 1.1        | 2          | 0.086         | 5.2             | 1.3      | 2.5      | 0.0443        |
| Diastolic BP                                       | 4        |                 |            |            |               | 2.3             | 0.6        | 1.1        | 0.3674        | 2.3             | 0.6      | 1.1      | 0.3726        |
| Cholesterol ratio * Intake of lipid-lowering drugs | 2        |                 |            |            |               | 0.6             | 0.3        | 0.6        | 0.5469        | 1.7             | 0.8      | 1.6      | 0.2057        |
| Pulse pressure * Intake of antihypertensive drugs  | 2        |                 |            |            |               | 1.4             | 0.7        | 1.3        | 0.2762        | 1.8             | 0.9      | 1.7      | 0.1883        |
| Diastolic BP * Intake of antihypertensive drugs    | 2        |                 |            |            |               | 2               | 1          | 1.8        | 0.1596        | 1.9             | 0.9      | 1.8      | 0.1728        |
| E/e'                                               | 2        |                 |            |            |               |                 |            |            |               | 4.3             | 2.1      | 4        | 0.0182        |
| E/A                                                | 2        |                 |            |            |               |                 |            |            |               | 0.8             | 0.4      | 0.8      | 0.4599        |
| Left atrial size index                             | 2        |                 |            |            |               |                 |            |            |               | 2.7             | 1.3      | 2.5      | 0.0835        |
| Total                                              | Σdf      | 44035.5         | 1420.5     | 2512       | < 0.0001      | 44838.6         | 915.1      | 1718.7     | < 0.0001      | 46445.2         | 844.5    | 1586.1   | < 0.0001      |
| Error                                              | n-Σdf    | 485.8           | 0.6        |            |               | 444.6           | 0.5        |            |               | 441.4           | 0.5      |          |               |

*Supplementary Table 2: Analyses of variance of model 1, 2, and 3 of subcortical gray matter volume (imputed analyses). Tests included all interaction terms of the corresponding factor. E/A - ratio of early and late mitral inflow velocities in diastole. E/e' - ratio of early mitral inflow velocity and early mitral annular velocity in diastole.*

### Supplementary Table 3 – White Matter Volume

| Variable                                           | model 1 (n=894) |             |             |            |               | model 2 (n=894) |             |            |               | model 3 (n=892) |             |            |               |
|----------------------------------------------------|-----------------|-------------|-------------|------------|---------------|-----------------|-------------|------------|---------------|-----------------|-------------|------------|---------------|
|                                                    | df              | SS          | MS          | F          | P             | SS              | MS          | F          | P             | SS              | MS          | F          | P             |
| Time interval                                      | 2               | 176.7       | 88.4        | 1.2        | 0.3165        | 307.8           | 153.9       | 2          | 0.1369        | 441             | 220.5       | 2.9        | 0.0562        |
| Baseline value of outcome                          | 2               | 796195.5    | 398097.7    | 5189       | < 0.0001      | 799399.6        | 399699.8    | 5175.6     | < 0.0001      | 812829.3        | 406414.7    | 5324.7     | < 0.0001      |
| Age                                                | 4               | 20946.3     | 5236.6      | 68.3       | < 0.0001      | 17960.2         | 4490.1      | 58.1       | < 0.0001      | 14048.1         | 3512        | 46         | < 0.0001      |
| Sex                                                | 3               | 2512.1      | 837.4       | 10.9       | < 0.0001      | 1822.4          | 607.5       | 7.9        | < 0.0001      | 1699.4          | 566.5       | 7.4        | < 0.0001      |
| Age * Sex                                          | 2               | 2475.1      | 1237.5      | 16.1       | < 0.0001      | 1797.8          | 898.9       | 11.6       | < 0.0001      | 1674.3          | 837.1       | 11         | < 0.0001      |
| Intracranial Volume                                | 2               | 882.8       | 441.4       | 5.8        | 0.0033        | 620.7           | 310.3       | 4          | 0.0183        | 489.1           | 244.5       | 3.2        | 0.0411        |
| Body height                                        | 2               | 693.3       | 346.6       | 4.5        | 0.0112        | 749.1           | 374.5       | 4.8        | 0.008         | 789.1           | 394.5       | 5.2        | 0.0059        |
| Body weight                                        | 2               | 124.1       | 62          | 0.8        | 0.4457        | 47.4            | 23.7        | 0.3        | 0.736         | 47.6            | 23.8        | 0.3        | 0.7321        |
| Years of education                                 | 2               | 149.1       | 74.6        | 1          | 0.3788        | 115.8           | 57.9        | 0.7        | 0.4727        | 120.6           | 60.3        | 0.8        | 0.4543        |
| Employment                                         | 3               | 271.5       | 90.5        | 1.2        | 0.3164        | 420.9           | 140.3       | 1.8        | 0.1425        | 338.4           | 112.8       | 1.5        | 0.2191        |
| Income                                             | 2               | 944         | 472         | 6.2        | 0.0022        | 627.3           | 313.7       | 4.1        | 0.0176        | 600             | 300         | 3.9        | 0.02          |
| Marital status                                     | 3               | 302.3       | 100.8       | 1.3        | 0.2688        | 197.3           | 65.8        | 0.9        | 0.4658        | 212.3           | 70.8        | 0.9        | 0.427         |
| Smoking status                                     | 2               | 16.4        | 8.2         | 0.1        | 0.8988        | 18.7            | 9.4         | 0.1        | 0.8858        | 6.7             | 3.4         | 0          | 0.957         |
| Alcohol consumption                                | 2               | 45.2        | 22.6        | 0.3        | 0.7449        | 72              | 36          | 0.5        | 0.6275        | 41.1            | 20.6        | 0.3        | 0.7639        |
| <b>Left Ventricular Mass Index</b>                 | <b>2</b>        | <b>66.4</b> | <b>33.2</b> | <b>0.4</b> | <b>0.6488</b> | <b>62.5</b>     | <b>31.3</b> | <b>0.4</b> | <b>0.6673</b> | <b>73.6</b>     | <b>36.8</b> | <b>0.5</b> | <b>0.6178</b> |
| Diabetes                                           | 1               |             |             |            |               | 509.7           | 509.7       | 6.6        | 0.0104        | 596             | 596         | 7.8        | 0.0053        |
| Hypertension                                       | 1               |             |             |            |               | 42.7            | 42.7        | 0.6        | 0.4575        | 64.7            | 64.7        | 0.8        | 0.3573        |
| Waist to height ratio                              | 2               |             |             |            |               | 247.4           | 123.7       | 1.6        | 0.2021        | 297.6           | 148.8       | 1.9        | 0.143         |
| Cholesterol ratio                                  | 4               |             |             |            |               | 175.3           | 43.8        | 0.6        | 0.6863        | 294.9           | 73.7        | 1          | 0.4254        |
| Intake of lipid-lowering drugs                     | 3               |             |             |            |               | 391.8           | 130.6       | 1.7        | 0.1674        | 665.7           | 221.9       | 2.9        | 0.0338        |
| Intake of antihypertensive drugs                   | 5               |             |             |            |               | 237.3           | 47.5        | 0.6        | 0.6888        | 144.6           | 28.9        | 0.4        | 0.8634        |
| Pulse pressure                                     | 4               |             |             |            |               | 412.9           | 103.2       | 1.3        | 0.2545        | 340             | 85          | 1.1        | 0.3488        |
| Diastolic BP                                       | 4               |             |             |            |               | 285.5           | 71.4        | 0.9        | 0.4491        | 315.6           | 78.9        | 1          | 0.3888        |
| Cholesterol ratio * Intake of lipid-lowering drugs | 2               |             |             |            |               | 168.9           | 84.5        | 1.1        | 0.3355        | 289.8           | 144.9       | 1.9        | 0.1505        |
| Pulse pressure * Intake of antihypertensive drugs  | 2               |             |             |            |               | 152.6           | 76.3        | 1          | 0.3727        | 116.3           | 58.2        | 0.8        | 0.467         |
| Diastolic BP * Intake of antihypertensive drugs    | 2               |             |             |            |               | 11.4            | 5.7         | 0.1        | 0.9291        | 0.6             | 0.3         | 0          | 0.996         |
| E/é                                                | 2               |             |             |            |               |                 |             |            |               | 184.6           | 92.3        | 1.2        | 0.2988        |
| E/A                                                | 2               |             |             |            |               |                 |             |            |               | 95.9            | 48          | 0.6        | 0.5336        |
| Left atrial size index                             | 2               |             |             |            |               |                 |             |            |               | 47.1            | 23.5        | 0.3        | 0.7347        |
| Total                                              | Σdf             | 4854462     | 156595.5    | 2041.1     | < 0.0001      | 5285459         | 107866.5    | 1396.7     | < 0.0001      | 5417685         | 98503.4     | 1290.6     | < 0.0001      |
| Error                                              | n-Σdf           | 66132.2     | 76.7        |            |               | 65179.8         | 77.2        |            |               | 63808.5         | 76.3        |            |               |

*Supplementary Table 3: Analyses of variance of model 1, 2, and 3 of white matter volume (imputed analyses). Tests included all interaction terms of the corresponding factor. E/A - ratio of early and late mitral inflow velocities in diastole. E/e' - ratio of early mitral inflow velocity and early mitral annular velocity in diastole.*

## Supplementary Table 4 – White Matter Hyperintensities Volume

| Variable                                           | df       | model 1 (N=890) |            |            |               | model 2 (n=889) |            |            |               | model 3 (n=890) |            |            |               |
|----------------------------------------------------|----------|-----------------|------------|------------|---------------|-----------------|------------|------------|---------------|-----------------|------------|------------|---------------|
|                                                    |          | SS              | MS         | F          | P             | SS              | MS         | F          | P             | SS              | MS         | F          | P             |
| Time interval                                      | 2        | 0.4             | 0.2        | 0.3        | 0.7768        | 1.2             | 0.6        | 0.8        | 0.4424        | 1               | 0.5        | 0.7        | 0.5056        |
| Baseline value of outcome                          | 2        | 3248.2          | 1624.1     | 2128.8     | < 0.0001      | 3095.8          | 1547.9     | 2070       | < 0.0001      | 3087.6          | 1543.8     | 2094.3     | < 0.0001      |
| Age                                                | 4        | 71.9            | 18         | 23.6       | < 0.0001      | 72.2            | 18         | 24.1       | < 0.0001      | 57.1            | 14.3       | 19.4       | < 0.0001      |
| Sex                                                | 3        | 48.7            | 16.2       | 21.3       | < 0.0001      | 32              | 10.7       | 14.3       | < 0.0001      | 22.8            | 7.6        | 10.3       | < 0.0001      |
| Age * Sex                                          | 2        | 32.3            | 16.1       | 21.2       | < 0.0001      | 21.5            | 10.8       | 14.4       | < 0.0001      | 16.1            | 8          | 10.9       | < 0.0001      |
| Intracranial Volume                                | 2        | 12.1            | 6          | 7.9        | 0.0004        | 14.7            | 7.3        | 9.8        | < 0.0001      | 11.9            | 6          | 8.1        | 0.0003        |
| Body height                                        | 2        | 3.3             | 1.6        | 2.2        | 0.1157        | 2               | 1          | 1.4        | 0.2583        | 3.4             | 1.7        | 2.3        | 0.1034        |
| Body weight                                        | 2        | 4.2             | 2.1        | 2.8        | 0.0643        | 0.7             | 0.3        | 0.5        | 0.6338        | 2.3             | 1.1        | 1.5        | 0.2132        |
| Years of education                                 | 2        | 0.2             | 0.1        | 0.1        | 0.8859        | 0.3             | 0.2        | 0.2        | 0.7932        | 0.4             | 0.2        | 0.3        | 0.7774        |
| Employment                                         | 3        | 6               | 2          | 2.6        | 0.0495        | 5.5             | 1.8        | 2.4        | 0.0627        | 5.9             | 2          | 2.7        | 0.046         |
| Income                                             | 2        | 0.5             | 0.3        | 0.4        | 0.7015        | 0.2             | 0.1        | 0.1        | 0.8715        | 0               | 0          | 0          | 0.992         |
| Marital status                                     | 3        | 2.1             | 0.7        | 0.9        | 0.4241        | 5.9             | 2          | 2.6        | 0.0501        | 3.3             | 1.1        | 1.5        | 0.2194        |
| Smoking status                                     | 2        | 6.3             | 3.1        | 4.1        | 0.0169        | 8.7             | 4.3        | 5.8        | 0.0032        | 8.7             | 4.4        | 5.9        | 0.0028        |
| Alcohol consumption                                | 2        | 3               | 1.5        | 1.9        | 0.1433        | 2.6             | 1.3        | 1.8        | 0.173         | 3.2             | 1.6        | 2.2        | 0.112         |
| <b>Left Ventricular Mass Index</b>                 | <b>2</b> | <b>4.7</b>      | <b>2.3</b> | <b>3.1</b> | <b>0.0472</b> | <b>3.4</b>      | <b>1.7</b> | <b>2.3</b> | <b>0.1045</b> | <b>3.1</b>      | <b>1.5</b> | <b>2.1</b> | <b>0.1244</b> |
| Diabetes                                           | 1        |                 |            |            |               | 3.6             | 3.6        | 4.8        | 0.0279        | 4.1             | 4.1        | 5.5        | 0.0188        |
| Hypertension                                       | 1        |                 |            |            |               | 0.3             | 0.3        | 0.4        | 0.5155        | 0.4             | 0.4        | 0.6        | 0.4509        |
| Waist to height ratio                              | 2        |                 |            |            |               | 0.3             | 0.1        | 0.2        | 0.8282        | 1.3             | 0.6        | 0.9        | 0.4234        |
| Cholesterol ratio                                  | 4        |                 |            |            |               | 6.4             | 1.6        | 2.1        | 0.0738        | 8.6             | 2.1        | 2.9        | 0.0209        |
| Intake of lipid-lowering drugs                     | 3        |                 |            |            |               | 9.4             | 3.1        | 4.2        | 0.0058        | 12.2            | 4.1        | 5.5        | 0.001         |
| Intake of antihypertensive drugs                   | 5        |                 |            |            |               | 2.3             | 0.5        | 0.6        | 0.6953        | 1.1             | 0.2        | 0.3        | 0.9148        |
| Pulse pressure                                     | 4        |                 |            |            |               | 3.7             | 0.9        | 1.2        | 0.3003        | 5.2             | 1.3        | 1.7        | 0.1376        |
| Diastolic BP                                       | 4        |                 |            |            |               | 4.8             | 1.2        | 1.6        | 0.1683        | 3.1             | 0.8        | 1.1        | 0.3755        |
| Cholesterol ratio * Intake of lipid-lowering drugs | 2        |                 |            |            |               | 5.4             | 2.7        | 3.6        | 0.0283        | 7.1             | 3.6        | 4.8        | 0.0082        |
| Pulse pressure * Intake of antihypertensive drugs  | 2        |                 |            |            |               | 0               | 0          | 0          | 0.9805        | 0.3             | 0.2        | 0.2        | 0.8108        |
| Diastolic BP * Intake of antihypertensive drugs    | 2        |                 |            |            |               | 2.2             | 1.1        | 1.5        | 0.2306        | 0.9             | 0.5        | 0.6        | 0.5288        |
| E/e'                                               | 2        |                 |            |            |               |                 |            |            |               | 8.3             | 4.2        | 5.6        | 0.0037        |
| E/A                                                | 2        |                 |            |            |               |                 |            |            |               | 0.8             | 0.4        | 0.5        | 0.5855        |
| Left atrial size index                             | 2        |                 |            |            |               |                 |            |            |               | 7.8             | 3.9        | 5.3        | 0.0052        |
| Total                                              | Σdf      | 16073.7         | 518.5      | 679.6      | < 0.0001      | 16885.5         | 344.6      | 460.8      | < 0.0001      | 16590.7         | 301.6      | 409.2      | < 0.0001      |
| Error                                              | n-Σdf    | 654.6           | 0.8        |            |               | 627.4           | 0.7        |            |               | 614.8           | 0.7        |            |               |

*Supplementary Table 4: Analyses of variance of model 1, 2, and 3 of white matter hyperintensities volume (imputed analyses). Tests included all interaction terms of the corresponding factor. E/A - ratio of early and late mitral inflow velocities in diastole. E/e' - ratio of early mitral inflow velocity and early mitral annular velocity in diastole.*

## Supplementary Table 5 – Global Cortical Thickness

| Variable                                           | df       | model 1 (n=896) |               |            |                    | model 2 (n=889) |               |            |               | model 3 (n=888) |               |            |               |
|----------------------------------------------------|----------|-----------------|---------------|------------|--------------------|-----------------|---------------|------------|---------------|-----------------|---------------|------------|---------------|
|                                                    |          | SS              | MS            | F          | P                  | SS              | MS            | F          | P             | SS              | MS            | F          | P             |
| Time interval                                      | 2        | 0.0016          | 0.0008        | 0.6        | 0.5326             | 0.0019          | 0.001         | 0.8        | 0.4586        | 0.0038          | 0.0019        | 1.6        | 0.2109        |
| Baseline value of outcome                          | 2        | 6.0825          | 3.0412        | 2427.7     | < 0.0001           | 5.5177          | 2.7588        | 2228       | < 0.0001      | 6.0988          | 3.0494        | 2529.7     | < 0.0001      |
| Age                                                | 4        | 0.0612          | 0.0153        | 12.2       | < 0.0001           | 0.0481          | 0.012         | 9.7        | < 0.0001      | 0.043           | 0.0107        | 8.9        | < 0.0001      |
| Sex                                                | 3        | 0.0014          | 0.0005        | 0.4        | 0.7658             | 0.0024          | 0.0008        | 0.6        | 0.5882        | 0.0043          | 0.0014        | 1.2        | 0.3166        |
| Age * Sex                                          | 2        | 0.001           | 0.0005        | 0.4        | 0.6724             | 0.0021          | 0.0011        | 0.9        | 0.4202        | 0.0029          | 0.0014        | 1.2        | 0.3023        |
| Intracranial Volume                                | 2        | 0.0041          | 0.002         | 1.6        | 0.1991             | 0.0097          | 0.0049        | 3.9        | 0.0201        | 0.0083          | 0.0042        | 3.5        | 0.032         |
| Body height                                        | 2        | 0.0065          | 0.0033        | 2.6        | 0.074              | 0.0029          | 0.0015        | 1.2        | 0.308         | 0.0042          | 0.0021        | 1.7        | 0.1766        |
| Body weight                                        | 2        | 0.0006          | 0.0003        | 0.2        | 0.8006             | 0.0018          | 0.0009        | 0.7        | 0.4907        | 0.0008          | 0.0004        | 0.3        | 0.7226        |
| Years of education                                 | 2        | 0.0039          | 0.002         | 1.6        | 0.2113             | 0.0019          | 0.0009        | 0.8        | 0.4712        | 0.0021          | 0.001         | 0.9        | 0.4206        |
| Employment                                         | 3        | 0.0023          | 0.0008        | 0.6        | 0.6128             | 0.0049          | 0.0016        | 1.3        | 0.2656        | 0.0037          | 0.0012        | 1          | 0.3838        |
| Income                                             | 2        | 0.0001          | 0.0001        | 0.1        | 0.9476             | 0.0013          | 0.0006        | 0.5        | 0.5918        | 0.0002          | 0.0001        | 0.1        | 0.9045        |
| Marital status                                     | 3        | 0.014           | 0.0047        | 3.7        | 0.0113             | 0.008           | 0.0027        | 2.1        | 0.0937        | 0.012           | 0.004         | 3.3        | 0.0192        |
| Smoking status                                     | 2        | 0.0068          | 0.0034        | 2.7        | 0.0656             | 0.0058          | 0.0029        | 2.4        | 0.0955        | 0.0027          | 0.0013        | 1.1        | 0.3323        |
| Alcohol consumption                                | 2        | 0.012           | 0.006         | 4.8        | 0.0086             | 0.009           | 0.0045        | 3.6        | 0.0272        | 0.0115          | 0.0057        | 4.8        | 0.0088        |
| <b>Left Ventricular Mass Index</b>                 | <b>2</b> | <b>0.0234</b>   | <b>0.0117</b> | <b>9.3</b> | <b>&lt; 0.0001</b> | <b>0.0229</b>   | <b>0.0114</b> | <b>9.2</b> | <b>0.0001</b> | <b>0.0215</b>   | <b>0.0108</b> | <b>8.9</b> | <b>0.0001</b> |
| Diabetes                                           | 1        |                 |               |            |                    | 0.0131          | 0.0131        | 10.5       | 0.0012        | 0.0145          | 0.0145        | 12         | 0.0005        |
| Hypertension                                       | 1        |                 |               |            |                    | 0.0024          | 0.0024        | 2          | 0.1616        | 0.0018          | 0.0018        | 1.5        | 0.2202        |
| Waist to height ratio                              | 2        |                 |               |            |                    | 0.0085          | 0.0042        | 3.4        | 0.0334        | 0.007           | 0.0035        | 2.9        | 0.0562        |
| Cholesterol ratio                                  | 4        |                 |               |            |                    | 0.003           | 0.0008        | 0.6        | 0.6554        | 0.0034          | 0.0008        | 0.7        | 0.5948        |
| Intake of lipid-lowering drugs                     | 3        |                 |               |            |                    | 0.0022          | 0.0007        | 0.6        | 0.624         | 0.0017          | 0.0006        | 0.5        | 0.6975        |
| Intake of antihypertensive drugs                   | 5        |                 |               |            |                    | 0.0051          | 0.001         | 0.8        | 0.5383        | 0.0041          | 0.0008        | 0.7        | 0.6405        |
| Pulse pressure                                     | 4        |                 |               |            |                    | 0.0008          | 0.0002        | 0.2        | 0.954         | 0.0036          | 0.0009        | 0.8        | 0.5577        |
| Diastolic BP                                       | 4        |                 |               |            |                    | 0.0047          | 0.0012        | 1          | 0.4301        | 0.0037          | 0.0009        | 0.8        | 0.5474        |
| Cholesterol ratio * Intake of lipid-lowering drugs | 2        |                 |               |            |                    | 0.0004          | 0.0002        | 0.2        | 0.8465        | 0.0004          | 0.0002        | 0.2        | 0.8455        |
| Pulse pressure * Intake of antihypertensive drugs  | 2        |                 |               |            |                    | 0.0003          | 0.0001        | 0.1        | 0.8997        | 0.0017          | 0.0008        | 0.7        | 0.5018        |
| Diastolic BP * Intake of antihypertensive drugs    | 2        |                 |               |            |                    | 0.0046          | 0.0023        | 1.8        | 0.1582        | 0.0031          | 0.0016        | 1.3        | 0.2752        |
| E/é                                                | 2        |                 |               |            |                    |                 |               |            |               | 0.001           | 0.0005        | 0.4        | 0.6711        |
| E/A                                                | 2        |                 |               |            |                    |                 |               |            |               | 0.0016          | 0.0008        | 0.7        | 0.5086        |
| Left atrial size index                             | 2        |                 |               |            |                    |                 |               |            |               | 0.0019          | 0.0009        | 0.8        | 0.4565        |
| Total                                              | ∑df      | 24.3193         | 0.7845        | 626.2      | < 0.0001           | 25.4333         | 0.519         | 419.2      | < 0.0001      | 30.9778         | 0.5632        | 467.2      | < 0.0001      |
| Error                                              | n-∑df    | 1.0824          | 0.0013        |            |                    | 1.0389          | 0.0012        |            |               | 1.0029          | 0.0012        |            |               |

*Supplementary Table 5: Analyses of variance of model 1, 2, and 3 of global cortical thickness (imputed analyses). Tests included all interaction terms of the corresponding factor. E/A - ratio of early and late mitral inflow velocities in diastole. E/e' - ratio of early mitral inflow velocity and early mitral annular velocity in diastole.*

## Supplementary Table 6 – Cortical Brain Age

| Variable                                           | df       | model 1 (n=885) |              |            |               | model 2 (n=886) |              |             |                    | model 3 (n=886) |              |             |                    |
|----------------------------------------------------|----------|-----------------|--------------|------------|---------------|-----------------|--------------|-------------|--------------------|-----------------|--------------|-------------|--------------------|
|                                                    |          | SS              | MS           | F          | P             | SS              | MS           | F           | P                  | SS              | MS           | F           | P                  |
| Time interval                                      | 2        | 225             | 112.5        | 3.8        | 0.0235        | 505.9           | 253          | 8.8         | 0.0002             | 469.1           | 234.6        | 8.1         | 0.0003             |
| Baseline value of outcome                          | 2        | 62306           | 31153        | 1043.1     | < 0.0001      | 64597.8         | 32298.9      | 1124.1      | < 0.0001           | 65545.2         | 32772.6      | 1133.4      | < 0.0001           |
| Age                                                | 4        | 1021.1          | 255.3        | 8.5        | < 0.0001      | 1098.1          | 274.5        | 9.6         | < 0.0001           | 919.8           | 230          | 8           | < 0.0001           |
| Sex                                                | 3        | 669.5           | 223.2        | 7.5        | < 0.0001      | 773.4           | 257.8        | 9           | < 0.0001           | 742.2           | 247.4        | 8.6         | < 0.0001           |
| Age * Sex                                          | 2        | 634.6           | 317.3        | 10.6       | < 0.0001      | 762.6           | 381.3        | 13.3        | < 0.0001           | 722.7           | 361.3        | 12.5        | < 0.0001           |
| Intracranial Volume                                | 2        | 222.6           | 111.3        | 3.7        | 0.0245        | 185.7           | 92.8         | 3.2         | 0.04               | 160.4           | 80.2         | 2.8         | 0.0631             |
| Body height                                        | 2        | 9.7             | 4.8          | 0.2        | 0.8507        | 17.4            | 8.7          | 0.3         | 0.7387             | 15.5            | 7.7          | 0.3         | 0.7652             |
| Body weight                                        | 2        | 29.5            | 14.7         | 0.5        | 0.6107        | 92.4            | 46.2         | 1.6         | 0.2011             | 72.7            | 36.4         | 1.3         | 0.2848             |
| Years of education                                 | 2        | 125.3           | 62.7         | 2.1        | 0.1233        | 63.6            | 31.8         | 1.1         | 0.3312             | 67.5            | 33.7         | 1.2         | 0.312              |
| Employment                                         | 3        | 75.7            | 25.2         | 0.8        | 0.4695        | 42.5            | 14.2         | 0.5         | 0.6872             | 33.5            | 11.2         | 0.4         | 0.7629             |
| Income                                             | 2        | 23.5            | 11.7         | 0.4        | 0.6751        | 53.2            | 26.6         | 0.9         | 0.3968             | 45.4            | 22.7         | 0.8         | 0.4564             |
| Marital status                                     | 3        | 188.5           | 62.8         | 2.1        | 0.0983        | 157.8           | 52.6         | 1.8         | 0.14               | 129.4           | 43.1         | 1.5         | 0.2152             |
| Smoking status                                     | 2        | 706.2           | 353.1        | 11.8       | < 0.0001      | 492.5           | 246.2        | 8.6         | 0.0002             | 377.1           | 188.6        | 6.5         | 0.0015             |
| Alcohol consumption                                | 2        | 203.4           | 101.7        | 3.4        | 0.0337        | 160.3           | 80.2         | 2.8         | 0.062              | 198.3           | 99.1         | 3.4         | 0.0329             |
| <b>Left Ventricular Mass Index</b>                 | <b>2</b> | <b>431.3</b>    | <b>215.6</b> | <b>7.2</b> | <b>0.0008</b> | <b>621.4</b>    | <b>310.7</b> | <b>10.8</b> | <b>&lt; 0.0001</b> | <b>642.6</b>    | <b>321.3</b> | <b>11.1</b> | <b>&lt; 0.0001</b> |
| Diabetes                                           | 1        |                 |              |            |               | 194.2           | 194.2        | 6.8         | 0.0095             | 201.6           | 201.6        | 7           | 0.0084             |
| Hypertension                                       | 1        |                 |              |            |               | 35.3            | 35.3         | 1.2         | 0.2679             | 38.3            | 38.3         | 1.3         | 0.2499             |
| Waist to height ratio                              | 2        |                 |              |            |               | 164.5           | 82.2         | 2.9         | 0.0577             | 120.7           | 60.3         | 2.1         | 0.1248             |
| Cholesterol ratio                                  | 4        |                 |              |            |               | 405.6           | 101.4        | 3.5         | 0.0072             | 413.1           | 103.3        | 3.6         | 0.0067             |
| Intake of lipid-lowering drugs                     | 3        |                 |              |            |               | 36.5            | 12.2         | 0.4         | 0.7366             | 38.5            | 12.8         | 0.4         | 0.722              |
| Intake of antihypertensive drugs                   | 5        |                 |              |            |               | 736.1           | 147.2        | 5.1         | 0.0001             | 686.4           | 137.3        | 4.7         | 0.0003             |
| Pulse pressure                                     | 4        |                 |              |            |               | 800.2           | 200.1        | 7           | < 0.0001           | 718.6           | 179.7        | 6.2         | < 0.0001           |
| Diastolic BP                                       | 4        |                 |              |            |               | 255.9           | 64           | 2.2         | 0.0645             | 239.4           | 59.8         | 2.1         | 0.0829             |
| Cholesterol ratio * Intake of lipid-lowering drugs | 2        |                 |              |            |               | 35.1            | 17.5         | 0.6         | 0.5436             | 38.4            | 19.2         | 0.7         | 0.5148             |
| Pulse pressure * Intake of antihypertensive drugs  | 2        |                 |              |            |               | 556.7           | 278.4        | 9.7         | < 0.0001           | 526.9           | 263.4        | 9.1         | 0.0001             |
| Diastolic BP * Intake of antihypertensive drugs    | 2        |                 |              |            |               | 56.6            | 28.3         | 1           | 0.3739             | 58.2            | 29.1         | 1           | 0.3659             |
| E/e'                                               | 2        |                 |              |            |               |                 |              |             |                    | 69.1            | 34.6         | 1.2         | 0.3031             |
| E/A                                                | 2        |                 |              |            |               |                 |              |             |                    | 20              | 10           | 0.3         | 0.7074             |
| Left atrial size index                             | 2        |                 |              |            |               |                 |              |             |                    | 7.9             | 3.9          | 0.1         | 0.8724             |
| Total                                              | Σdf      | 396706.9        | 12797        | 428.5      | < 0.0001      | 527924.2        | 10774        | 375         | < 0.0001           | 486188.5        | 8839.8       | 305.7       | < 0.0001           |
| Error                                              | n-Σdf    | 25476.4         | 29.9         |            |               | 24021.8         | 28.7         |             |                    | 24000.2         | 28.9         |             |                    |

*Supplementary Table 6: Analyses of variance of model 1, 2, and 3 of cortical brain age (imputed analyses). Tests included all interaction terms of the corresponding factor. E/A - ratio of early and late mitral inflow velocities in diastole. E/e' - ratio of early mitral inflow velocity and early mitral annular velocity in diastole.*

## Supplementary Table 7 – Subcortical Brain Age

| Variable                                           | df       | model 1     |             |            |               | model 2   |           |            |               | model 3   |           |          |               |
|----------------------------------------------------|----------|-------------|-------------|------------|---------------|-----------|-----------|------------|---------------|-----------|-----------|----------|---------------|
|                                                    |          | SS          | MS          | F          | P             | SS        | MS        | F          | P             | SS        | MS        | F        | P             |
| Time interval                                      | 2        | 458.2       | 229.1       | 11.6       | < 0.0001      | 532.6     | 266.3     | 13.5       | < 0.0001      | 572.8     | 286.4     | 14.4     | < 0.0001      |
| Baseline value of outcome                          | 2        | 105385.5    | 52692.8     | 2670.2     | < 0.0001      | 100505.1  | 50252.6   | 2548.9     | < 0.0001      | 103241.5  | 51620.7   | 2600.9   | < 0.0001      |
| Age                                                | 4        | 1738.3      | 434.6       | 22         | < 0.0001      | 1785.1    | 446.3     | 22.6       | < 0.0001      | 1311.5    | 327.9     | 16.5     | < 0.0001      |
| Sex                                                | 3        | 350.4       | 116.8       | 5.9        | 0.0005        | 234.7     | 78.2      | 4          | 0.008         | 136.2     | 45.4      | 2.3      | 0.0773        |
| Age * Sex                                          | 2        | 33.8        | 16.9        | 0.9        | 0.4247        | 27.2      | 13.6      | 0.7        | 0.5019        | 34.8      | 17.4      | 0.9      | 0.4166        |
| Intracranial Volume                                | 2        | 281.7       | 140.8       | 7.1        | 0.0008        | 263.7     | 131.8     | 6.7        | 0.0013        | 262.6     | 131.3     | 6.6      | 0.0014        |
| Body height                                        | 2        | 46.8        | 23.4        | 1.2        | 0.3057        | 53.9      | 27        | 1.4        | 0.2553        | 45.2      | 22.6      | 1.1      | 0.3205        |
| Body weight                                        | 2        | 62          | 31          | 1.6        | 0.2084        | 6.7       | 3.3       | 0.2        | 0.8438        | 26.2      | 13.1      | 0.7      | 0.517         |
| Years of education                                 | 2        | 20.6        | 10.3        | 0.5        | 0.5936        | 49.5      | 24.7      | 1.3        | 0.2855        | 63.6      | 31.8      | 1.6      | 0.2022        |
| Employment                                         | 3        | 99.9        | 33.3        | 1.7        | 0.1683        | 168.1     | 56        | 2.8        | 0.0369        | 79.4      | 26.5      | 1.3      | 0.2621        |
| Income                                             | 2        | 27.2        | 13.6        | 0.7        | 0.5026        | 35.2      | 17.6      | 0.9        | 0.4105        | 18.7      | 9.3       | 0.5      | 0.6252        |
| Marital status                                     | 3        | 289.2       | 96.4        | 4.9        | 0.0023        | 155.4     | 51.8      | 2.6        | 0.0492        | 173.6     | 57.9      | 2.9      | 0.0335        |
| Smoking status                                     | 2        | 105.2       | 52.6        | 2.7        | 0.0701        | 147.6     | 73.8      | 3.7        | 0.0241        | 158.5     | 79.2      | 4        | 0.0188        |
| Alcohol consumption                                | 2        | 233.4       | 116.7       | 5.9        | 0.0028        | 214.4     | 107.2     | 5.4        | 0.0045        | 257.8     | 128.9     | 6.5      | 0.0016        |
| <b>LVMl</b>                                        | <b>2</b> | <b>58.4</b> | <b>29.2</b> | <b>1.5</b> | <b>0.2285</b> | <b>28</b> | <b>14</b> | <b>0.7</b> | <b>0.4918</b> | <b>40</b> | <b>20</b> | <b>1</b> | <b>0.3656</b> |
| Diabetes                                           | 1        |             |             |            |               | 0.7       | 0.7       | 0          | 0.846         | 4.8       | 4.8       | 0.2      | 0.6218        |
| Hypertension                                       | 1        |             |             |            |               | 5.3       | 5.3       | 0.3        | 0.6037        | 0.2       | 0.2       | 0        | 0.9267        |
| Waist to height ratio                              | 2        |             |             |            |               | 1.5       | 0.8       | 0          | 0.9626        | 17.2      | 8.6       | 0.4      | 0.6489        |
| Cholesterol ratio                                  | 4        |             |             |            |               | 28.3      | 7.1       | 0.4        | 0.8377        | 41.1      | 10.3      | 0.5      | 0.7232        |
| Intake of lipid-lowering drugs                     | 3        |             |             |            |               | 13.8      | 4.6       | 0.2        | 0.8732        | 31.9      | 10.6      | 0.5      | 0.6582        |
| Intake of antihypertensive drugs                   | 5        |             |             |            |               | 163.3     | 32.7      | 1.7        | 0.1427        | 234.2     | 46.8      | 2.4      | 0.0386        |
| Pulse pressure                                     | 4        |             |             |            |               | 44.7      | 11.2      | 0.6        | 0.6865        | 61.2      | 15.3      | 0.8      | 0.5445        |
| Diastolic BP                                       | 4        |             |             |            |               | 355.9     | 89        | 4.5        | 0.0013        | 339.5     | 84.9      | 4.3      | 0.002         |
| Cholesterol ratio * Intake of lipid-lowering drugs | 2        |             |             |            |               | 10.3      | 5.1       | 0.3        | 0.7702        | 23.2      | 11.6      | 0.6      | 0.5581        |
| Pulse pressure * Intake of antihypertensive drugs  | 2        |             |             |            |               | 32.2      | 16.1      | 0.8        | 0.4423        | 40.5      | 20.2      | 1        | 0.3613        |
| Diastolic BP * Intake of antihypertensive drugs    | 2        |             |             |            |               | 132.7     | 66.3      | 3.4        | 0.0351        | 197.1     | 98.6      | 5        | 0.0072        |
| E/e'                                               | 2        |             |             |            |               | 0         | 0         |            |               | 291.3     | 145.7     | 7.3      | 0.0007        |
| E/A                                                | 2        |             |             |            |               | 0         | 0         |            |               | 0.6       | 0.3       | 0        | 0.9855        |
| LAI                                                | 2        |             |             |            |               | 0         | 0         |            |               | 30.1      | 15.1      | 0.8      | 0.4683        |
| Total                                              | 55       | 669740.6    | 21604.5     | 1094.8     | < 0.0001      | 739206.5  | 15085.8   | 765.2      | < 0.0001      | 781531.3  | 14209.7   | 715.9    | < 0.0001      |
| Error                                              | 829      | 16832.7     | 19.7        |            |               | 16442.6   | 19.7      |            |               | 16453.7   | 19.8      |          |               |

*Supplementary Table 7: Analyses of variance of model 1, 2, and 3 of subcortical brain age (imputed analyses). Tests included all interaction terms of the corresponding factor. E/A - ratio of early and late mitral inflow velocities in diastole. E/e' - ratio of early mitral inflow velocity and early mitral annular velocity in diastole.*

## Supplementary Table 8 – Brain Age

| Variable                                           | df       | model 1     |             |            |               | model 2     |             |            |               | model 3     |             |            |               |
|----------------------------------------------------|----------|-------------|-------------|------------|---------------|-------------|-------------|------------|---------------|-------------|-------------|------------|---------------|
|                                                    |          | SS          | MS          | F          | P             | SS          | MS          | F          | P             | SS          | MS          | F          | P             |
| Time interval                                      | 2        | 76.5        | 38.2        | 4.4        | 0.013         | 109.7       | 54.9        | 6.3        | 0.0019        | 99          | 49.5        | 5.9        | 0.003         |
| Baseline value of outcome                          | 2        | 19533.3     | 9766.7      | 1115.7     | < 0.0001      | 19244.3     | 9622.2      | 1108.9     | < 0.0001      | 19479.2     | 9739.6      | 1154       | < 0.0001      |
| Age                                                | 4        | 497         | 124.3       | 14.2       | < 0.0001      | 414.9       | 103.7       | 12         | < 0.0001      | 305.1       | 76.3        | 9          | < 0.0001      |
| Sex                                                | 3        | 33.2        | 11.1        | 1.3        | 0.2858        | 52.2        | 17.4        | 2          | 0.1119        | 51.1        | 17          | 2          | 0.11          |
| Age * Sex                                          | 2        | 25.4        | 12.7        | 1.5        | 0.2349        | 49.6        | 24.8        | 2.9        | 0.058         | 50.5        | 25.2        | 3          | 0.0509        |
| Intracranial Volume                                | 2        | 88.5        | 44.3        | 5.1        | 0.0066        | 44          | 22          | 2.5        | 0.08          | 32.7        | 16.4        | 1.9        | 0.1444        |
| Body height                                        | 2        | 7.1         | 3.5         | 0.4        | 0.6685        | 0.4         | 0.2         | 0          | 0.9748        | 0.9         | 0.5         | 0.1        | 0.947         |
| Body weight                                        | 2        | 19.8        | 9.9         | 1.1        | 0.3224        | 20.5        | 10.3        | 1.2        | 0.307         | 21.9        | 11          | 1.3        | 0.2734        |
| Years of education                                 | 2        | 117.1       | 58.5        | 6.7        | 0.0013        | 94.8        | 47.4        | 5.5        | 0.0044        | 95.7        | 47.9        | 5.7        | 0.0036        |
| Employment                                         | 3        | 18.2        | 6.1         | 0.7        | 0.5557        | 10.9        | 3.6         | 0.4        | 0.7409        | 8.3         | 2.8         | 0.3        | 0.8066        |
| Income                                             | 2        | 0.6         | 0.3         | 0          | 0.9665        | 4.6         | 2.3         | 0.3        | 0.7691        | 2.8         | 1.4         | 0.2        | 0.8453        |
| Marital status                                     | 3        | 119.9       | 40          | 4.6        | 0.0035        | 48.7        | 16.2        | 1.9        | 0.1329        | 32.6        | 10.9        | 1.3        | 0.2781        |
| Smoking status                                     | 2        | 182.4       | 91.2        | 10.4       | < 0.0001      | 204.7       | 102.4       | 11.8       | < 0.0001      | 161.1       | 80.5        | 9.5        | < 0.0001      |
| Alcohol consumption                                | 2        | 38.7        | 19.3        | 2.2        | 0.1104        | 47          | 23.5        | 2.7        | 0.0674        | 71.4        | 35.7        | 4.2        | 0.0148        |
| <b>LVMI</b>                                        | <b>2</b> | <b>45.8</b> | <b>22.9</b> | <b>2.6</b> | <b>0.0738</b> | <b>23.5</b> | <b>11.7</b> | <b>1.4</b> | <b>0.2591</b> | <b>30.8</b> | <b>15.4</b> | <b>1.8</b> | <b>0.1619</b> |
| Diabetes                                           | 1        |             |             |            |               | 0.3         | 0.3         | 0          | 0.8617        | 0.5         | 0.5         | 0.1        | 0.8156        |
| Hypertension                                       | 1        |             |             |            |               | 0.5         | 0.5         | 0.1        | 0.8075        | 1           | 1           | 0.1        | 0.7369        |
| Waist to height ratio                              | 2        |             |             |            |               | 15.3        | 7.7         | 0.9        | 0.4135        | 21.8        | 10.9        | 1.3        | 0.2746        |
| Cholesterol ratio                                  | 4        |             |             |            |               | 44.9        | 11.2        | 1.3        | 0.2708        | 38.3        | 9.6         | 1.1        | 0.3389        |
| Intake of lipid-lowering drugs                     | 3        |             |             |            |               | 2.7         | 0.9         | 0.1        | 0.9575        | 2.3         | 0.8         | 0.1        | 0.965         |
| Intake of antihypertensive drugs                   | 5        |             |             |            |               | 194.5       | 38.9        | 4.5        | 0.0005        | 159         | 31.8        | 3.8        | 0.0022        |
| Pulse pressure                                     | 4        |             |             |            |               | 289.3       | 72.3        | 8.3        | < 0.0001      | 218.8       | 54.7        | 6.5        | < 0.0001      |
| Diastolic BP                                       | 4        |             |             |            |               | 93.7        | 23.4        | 2.7        | 0.0297        | 87.1        | 21.8        | 2.6        | 0.0362        |
| Cholesterol ratio * Intake of lipid-lowering drugs | 2        |             |             |            |               | 1.7         | 0.9         | 0.1        | 0.905         | 1.4         | 0.7         | 0.1        | 0.9218        |
| Pulse pressure * Intake of antihypertensive drugs  | 2        |             |             |            |               | 165         | 82.5        | 9.5        | < 0.0001      | 135.4       | 67.7        | 8          | 0.0004        |
| Diastolic BP * Intake of antihypertensive drugs    | 2        |             |             |            |               | 27.7        | 13.8        | 1.6        | 0.2034        | 28.8        | 14.4        | 1.7        | 0.1827        |
| E/e'                                               | 2        |             |             |            |               | 0           | 0           |            |               | 57.5        | 28.7        | 3.4        | 0.0337        |
| E/A                                                | 2        |             |             |            |               | 0           | 0           |            |               | 31.6        | 15.8        | 1.9        | 0.1542        |
| LAI                                                | 2        |             |             |            |               | 0           | 0           |            |               | 71.2        | 35.6        | 4.2        | 0.015         |
| Total                                              | 55       | 189402      | 6109.7      | 698        | < 0.0001      | 262425.9    | 5355.6      | 617.2      | < 0.0001      | 274053.9    | 4982.8      | 590.4      | < 0.0001      |
| Error                                              | 831      | 7484.4      | 8.8         |            |               | 7289.1      | 8.7         |            |               | 7013.6      | 8.4         |            |               |

*Supplementary Table 8: Analyses of variance of model 1, 2, and 3 of brain age (imputed analyses). Tests included all interaction terms of the corresponding factor. E/A - ratio of early and late mitral inflow velocities in diastole. E/e' - ratio of early mitral inflow velocity and early mitral annular velocity in diastole.*



## Supplementary Table 9

| Outcome                               | Left Hemisphere         |          | Right Hemisphere        |          |
|---------------------------------------|-------------------------|----------|-------------------------|----------|
|                                       | Effect size (95% CI)    | <i>t</i> | Effect size (95% CI)    | <i>t</i> |
| Banks of the superior temporal sulcus | -0.013 (-0.024, -0.002) | -2.41*   | -0.012 (-0.024, 0)      | -2.04    |
| Caudal anterior cingulate cortex      | -0.001 (-0.012, 0.01)   | -0.15    | -0.001 (-0.013, 0.011)  | -0.1     |
| Caudal middle frontal gyrus           | -0.025 (-0.038, -0.011) | -3.62**  | -0.031 (-0.047, -0.015) | -3.85*** |
| Cuneus cortex                         | -0.014 (-0.022, -0.005) | -3.23**  | -0.01 (-0.02, -0.001)   | -2.19    |
| Entorhinal cortex                     | -0.005 (-0.026, 0.017)  | -0.41    | 0.016 (-0.003, 0.035)   | 1.65     |
| Fusiform gyrus                        | -0.023 (-0.034, -0.011) | -3.94*** | -0.022 (-0.033, -0.011) | -3.83*** |
| Inferior parietal cortex              | -0.027 (-0.039, -0.014) | -4.05*** | -0.01 (-0.021, 0.001)   | -1.71    |
| Inferior temporal gyrus               | 0 (-0.011, 0.011)       | -0.02    | -0.009 (-0.019, 0)      | -1.95    |
| Isthmus cingulate cortex              | 0.008 (-0.004, 0.02)    | 1.27     | -0.001 (-0.009, 0.007)  | -0.2     |
| Lateral occipital cortex              | -0.015 (-0.025, -0.004) | -2.81*   | -0.016 (-0.025, -0.007) | -3.52**  |
| Lateral orbitofrontal cortex          | -0.01 (-0.023, 0.004)   | -1.42    | -0.009 (-0.021, 0.003)  | -1.51    |
| Lingual gyrus                         | -0.01 (-0.019, 0)       | -1.93    | -0.009 (-0.017, -0.002) | -2.47*   |
| Medial orbitofrontal cortex           | -0.009 (-0.02, 0.003)   | -1.46    | -0.017 (-0.028, -0.007) | -3.3**   |
| Middle temporal gyrus                 | 0 (-0.013, 0.013)       | 0.01     | -0.013 (-0.024, -0.002) | -2.29    |
| Parahippocampal gyrus                 | -0.006 (-0.016, 0.004)  | -1.16    | -0.002 (-0.013, 0.01)   | -0.28    |
| Paracentral lobule                    | -0.005 (-0.021, 0.012)  | -0.59    | -0.015 (-0.029, -0.001) | -2.04    |
| Pars opercularis                      | -0.014 (-0.025, -0.004) | -2.66*   | -0.006 (-0.017, 0.006)  | -1       |
| Pars orbitalis                        | -0.019 (-0.038, 0)      | -1.98    | -0.011 (-0.028, 0.006)  | -1.28    |
| Pars triangularis                     | -0.019 (-0.029, -0.008) | -3.47**  | -0.02 (-0.031, -0.01)   | -3.71**  |
| Pericalcarine cortex                  | -0.01 (-0.02, -0.001)   | -2.13    | -0.009 (-0.017, -0.001) | -2.23    |
| Postcentral gyrus                     | -0.011 (-0.02, -0.003)  | -2.58*   | -0.016 (-0.025, -0.006) | -3.17**  |
| Posterior cingulate cortex            | 0.006 (-0.003, 0.015)   | 1.31     | -0.011 (-0.021, -0.001) | -2.23    |
| Precentral gyrus                      | -0.029 (-0.044, -0.015) | -3.95*** | -0.04 (-0.058, -0.022)  | -4.4***  |
| Precuneus cortex                      | -0.008 (-0.019, 0.002)  | -1.52    | -0.003 (-0.012, 0.006)  | -0.57    |
| Rostral anterior cingulate cortex     | -0.009 (-0.02, 0.002)   | -1.65    | -0.011 (-0.023, 0)      | -1.94    |
| Rostral middle frontal gyrus          | -0.023 (-0.032, -0.013) | -4.82*** | -0.013 (-0.025, -0.002) | -2.26    |
| Superior frontal gyrus                | -0.037 (-0.051, -0.023) | -5.22*** | -0.023 (-0.037, -0.008) | -3**     |
| Superior parietal cortex              | -0.006 (-0.018, 0.006)  | -0.96    | -0.005 (-0.017, 0.008)  | -0.76    |
| Superior temporal gyrus               | -0.007 (-0.018, 0.004)  | -1.31    | -0.019 (-0.029, -0.009) | -3.76**  |
| Supramarginal gyrus                   | -0.016 (-0.028, -0.005) | -2.76*   | -0.016 (-0.025, -0.006) | -3.16**  |
| Frontal pole                          | -0.052 (-0.077, -0.028) | -4.2***  | -0.001 (-0.022, 0.021)  | -0.06    |
| Temporal pole                         | -0.006 (-0.026, 0.014)  | -0.58    | -0.016 (-0.033, 0.001)  | -1.89    |
| Transverse temporal cortex            | -0.03 (-0.05, -0.009)   | -2.88*   | 0.008 (-0.017, 0.033)   | 0.64     |
| Insular cortex                        | -0.008 (-0.02, 0.005)   | -1.22    | -0.003 (-0.013, 0.007)  | -0.6     |

*Supplementary Table 9: Point estimates of direct effects of baseline LVMI on regional cortical thicknesses at follow-up (model 2; imputed analyses). Effects adjusted for socio-demographic factors, anthropometric variables, lifestyle factors, cardiovascular risk factors and medication, follow-up time, and baseline value of the outcome (model 2). \*  $p_{FDR}<0.05$ , \*\*  $p_{FDR}<0.01$ , \*\*\*  $p_{FDR}<0.001$*

**Supplementary Table 10 – Total Brain Volume (Complete Case Analysis)**

| Variable                                              | df       | model 1      |              |            |               | model 2      |             |            |               | model 3    |           |            |               |
|-------------------------------------------------------|----------|--------------|--------------|------------|---------------|--------------|-------------|------------|---------------|------------|-----------|------------|---------------|
|                                                       |          | SS           | MS           | F          | P             | SS           | MS          | F          | P             | SS         | MS        | F          | P             |
| Time interval                                         | 2        | 1796.7       | 898.3        | 8.5        | 0.0002        | 2413.3       | 1206.6      | 11.8       | < 0.0001      | 2748.3     | 1374.2    | 14.6       | < 0.0001      |
| Baseline value of outcome                             | 2        | 1189785      | 594892.4     | 5638.8     | < 0.0001      | 1300883      | 650441.4    | 6386.8     | < 0.0001      | 1242438    | 621219.1  | 6587.8     | < 0.0001      |
| Age                                                   | 4        | 21524.8      | 5381.2       | 51         | < 0.0001      | 18583.6      | 4645.9      | 45.6       | < 0.0001      | 16085.8    | 4021.5    | 42.6       | < 0.0001      |
| Sex                                                   | 3        | 2242.9       | 747.6        | 7.1        | 0.0001        | 2137.3       | 712.4       | 7          | 0.0001        | 2076.1     | 692       | 7.3        | < 0.0001      |
| Age * Sex                                             | 2        | 2216.1       | 1108         | 10.5       | < 0.0001      | 1991.5       | 995.7       | 9.8        | < 0.0001      | 2009.7     | 1004.9    | 10.7       | < 0.0001      |
| Intracranial Volume                                   | 2        | 237.1        | 118.6        | 1.1        | 0.3255        | 489.9        | 244.9       | 2.4        | 0.0909        | 425.9      | 213       | 2.3        | 0.1052        |
| Body height                                           | 2        | 754.7        | 377.4        | 3.6        | 0.0284        | 561.2        | 280.6       | 2.8        | 0.0642        | 707.6      | 353.8     | 3.8        | 0.0239        |
| Body weight                                           | 2        | 115.1        | 57.5         | 0.5        | 0.5799        | 600.1        | 300         | 2.9        | 0.0531        | 167.5      | 83.8      | 0.9        | 0.4118        |
| Years of education                                    | 2        | 127.2        | 63.6         | 0.6        | 0.5474        | 214.6        | 107.3       | 1.1        | 0.3491        | 132.9      | 66.4      | 0.7        | 0.4947        |
| Employment                                            | 3        | 231.3        | 77.1         | 0.7        | 0.5337        | 392.9        | 131         | 1.3        | 0.278         | 258.7      | 86.2      | 0.9        | 0.4335        |
| Income                                                | 2        | 654.5        | 327.2        | 3.1        | 0.0455        | 558.4        | 279.2       | 2.7        | 0.0651        | 413.7      | 206.9     | 2.2        | 0.1122        |
| Marital status                                        | 3        | 1931.4       | 643.8        | 6.1        | 0.0004        | 1569.6       | 523.2       | 5.1        | 0.0016        | 2869.5     | 956.5     | 10.1       | < 0.0001      |
| Smoking status                                        | 2        | 454          | 227          | 2.2        | 0.1169        | 466.6        | 233.3       | 2.3        | 0.1018        | 222.9      | 111.4     | 1.2        | 0.3073        |
| Alcohol consumption                                   | 2        | 151.1        | 75.6         | 0.7        | 0.4889        | 185.4        | 92.7        | 0.9        | 0.4028        | 238.1      | 119.1     | 1.3        | 0.2835        |
| <b>LVMl</b>                                           | <b>2</b> | <b>506.8</b> | <b>253.4</b> | <b>2.4</b> | <b>0.0912</b> | <b>138.7</b> | <b>69.3</b> | <b>0.7</b> | <b>0.5065</b> | <b>178</b> | <b>89</b> | <b>0.9</b> | <b>0.3895</b> |
| Diabetes                                              | 1        |              |              |            |               | 474.8        | 474.8       | 4.7        | 0.0311        | 536.4      | 536.4     | 5.7        | 0.0173        |
| Hypertension                                          | 1        |              |              |            |               | 6.9          | 6.9         | 0.1        | 0.7941        | 8.2        | 8.2       | 0.1        | 0.7688        |
| Waist to height ratio                                 | 2        |              |              |            |               | 733.8        | 366.9       | 3.6        | 0.0277        | 631        | 315.5     | 3.3        | 0.0358        |
| Cholesterol ratio                                     | 4        |              |              |            |               | 168.1        | 42          | 0.4        | 0.7996        | 79.4       | 19.9      | 0.2        | 0.9326        |
| Intake of lipidlowering drugs                         | 3        |              |              |            |               | 119.5        | 39.8        | 0.4        | 0.7595        | 14         | 4.7       | 0          | 0.9854        |
| Intake of antihypertensive drugs                      | 5        |              |              |            |               | 1872.4       | 374.5       | 3.7        | 0.0027        | 2286.8     | 457.4     | 4.9        | 0.0002        |
| Pulse pressure                                        | 4        |              |              |            |               | 165.4        | 41.4        | 0.4        | 0.8043        | 221        | 55.2      | 0.6        | 0.673         |
| Diastolic BP                                          | 4        |              |              |            |               | 1667.1       | 416.8       | 4.1        | 0.0027        | 2176.2     | 544.1     | 5.8        | 0.0001        |
| Cholesterol ratio * Intake of antihypertensives drugs | 2        |              |              |            |               | 108.7        | 54.4        | 0.5        | 0.5866        | 9.4        | 4.7       | 0          | 0.9514        |
| Pulse pressure * Intake of antihypertensive drugs     | 2        |              |              |            |               | 36.8         | 18.4        | 0.2        | 0.8348        | 24.1       | 12.1      | 0.1        | 0.88          |
| Diastolic BP * Antihypertensives                      | 2        |              |              |            |               | 1574.5       | 787.3       | 7.7        | 0.0005        | 2137.3     | 1068.7    | 11.3       | < 0.0001      |
| E/é                                                   | 2        |              |              |            |               |              |             |            |               | 241.3      | 120.6     | 1.3        | 0.2789        |
| E/A                                                   | 2        |              |              |            |               |              |             |            |               | 334.4      | 167.2     | 1.8        | 0.1705        |
| LAI                                                   | 2        |              |              |            |               |              |             |            |               | 94.6       | 47.3      | 0.5        | 0.6057        |
| Total                                                 | 55       | 16467992     | 531225.5     | 5035.3     | < 0.0001      | 17426898     | 355651      | 3492.2     | < 0.0001      | 16346421   | 297207.6  | 3151.8     | < 0.0001      |
| Error                                                 | 747      | 86087.6      | 105.5        |            |               | 80760.8      | 101.8       |            |               | 70440.9    | 94.3      |            |               |

*Supplementary Table 10: Analyses of variance of model 1, 2, and 3 of total brain volume (complete case analyses). Tests included all interaction terms of the corresponding factor. E/A - ratio of early and late mitral inflow velocities in diastole. E/e' - ratio of early mitral inflow velocity and early mitral annular velocity in diastole.*

**Supplementary Table 11 – Subcortical Gray Matter Volume (Complete Case Analysis)**

| Variable                                              | df       | model 1    |            |            |               | model 2    |            |            |               | model 3    |            |            |               |
|-------------------------------------------------------|----------|------------|------------|------------|---------------|------------|------------|------------|---------------|------------|------------|------------|---------------|
|                                                       |          | SS         | MS         | F          | P             | SS         | MS         | F          | P             | SS         | MS         | F          | P             |
| Time interval                                         | 2        | 7          | 3.5        | 6.4        | 0.0017        | 8.9        | 4.4        | 8.3        | 0.0003        | 10.1       | 5          | 10         | < 0.0001      |
| Baseline value of outcome                             | 2        | 8072       | 4036       | 7377.2     | < 0.0001      | 6551.8     | 3275.9     | 6104.6     | < 0.0001      | 6234.7     | 3117.3     | 6187.1     | < 0.0001      |
| Age                                                   | 4        | 80.2       | 20         | 36.6       | < 0.0001      | 72.1       | 18         | 33.6       | < 0.0001      | 51.2       | 12.8       | 25.4       | < 0.0001      |
| Sex                                                   | 3        | 3.1        | 1          | 1.9        | 0.1291        | 3.9        | 1.3        | 2.4        | 0.0657        | 10.6       | 3.5        | 7          | 0.0001        |
| Age * Sex                                             | 2        | 2.9        | 1.4        | 2.6        | 0.0731        | 3.1        | 1.6        | 2.9        | 0.0548        | 6.7        | 3.3        | 6.6        | 0.0014        |
| Intracranial Volume                                   | 2        | 4.7        | 2.3        | 4.3        | 0.0144        | 2.2        | 1.1        | 2          | 0.1318        | 1.8        | 0.9        | 1.8        | 0.1725        |
| Body height                                           | 2        | 0          | 0          | 0          | 0.9783        | 0.3        | 0.2        | 0.3        | 0.7488        | 0.7        | 0.3        | 0.7        | 0.5184        |
| Body weight                                           | 2        | 2.1        | 1          | 1.9        | 0.1522        | 4.2        | 2.1        | 3.9        | 0.0209        | 3.4        | 1.7        | 3.4        | 0.0353        |
| Years of education                                    | 2        | 0.5        | 0.3        | 0.5        | 0.6334        | 0.1        | 0          | 0.1        | 0.9313        | 0.1        | 0.1        | 0.1        | 0.897         |
| Employment                                            | 3        | 1.7        | 0.6        | 1          | 0.3888        | 0.7        | 0.2        | 0.4        | 0.7464        | 0.3        | 0.1        | 0.2        | 0.9092        |
| Income                                                | 2        | 1.6        | 0.8        | 1.4        | 0.2374        | 1.7        | 0.9        | 1.6        | 0.199         | 2.3        | 1.2        | 2.3        | 0.0995        |
| Marital status                                        | 3        | 11.6       | 3.9        | 7.1        | 0.0001        | 10.9       | 3.6        | 6.7        | 0.0002        | 7.9        | 2.6        | 5.2        | 0.0014        |
| Smoking status                                        | 2        | 5.3        | 2.6        | 4.8        | 0.0083        | 4.5        | 2.3        | 4.2        | 0.0154        | 5.7        | 2.9        | 5.7        | 0.0036        |
| Alcohol consumption                                   | 2        | 2.2        | 1.1        | 2          | 0.1387        | 1.6        | 0.8        | 1.5        | 0.2164        | 2.3        | 1.1        | 2.3        | 0.1037        |
| <b>LVMl</b>                                           | <b>2</b> | <b>0.6</b> | <b>0.3</b> | <b>0.6</b> | <b>0.5757</b> | <b>0.5</b> | <b>0.3</b> | <b>0.5</b> | <b>0.6185</b> | <b>0.5</b> | <b>0.3</b> | <b>0.5</b> | <b>0.5868</b> |
| Diabetes                                              | 1        |            |            |            |               | 0          | 0          | 0          | 0.8498        | 0.3        | 0.3        | 0.5        | 0.4622        |
| Hypertension                                          | 1        |            |            |            |               | 0.1        | 0.1        | 0.2        | 0.6309        | 0.1        | 0.1        | 0.3        | 0.5997        |
| Waist to height ratio                                 | 2        |            |            |            |               | 6.2        | 3.1        | 5.7        | 0.0034        | 3.4        | 1.7        | 3.4        | 0.0334        |
| Cholesterol ratio                                     | 4        |            |            |            |               | 1.5        | 0.4        | 0.7        | 0.5895        | 0.2        | 0.1        | 0.1        | 0.9786        |
| Intake of lipidlowering drugs                         | 3        |            |            |            |               | 1.1        | 0.4        | 0.7        | 0.5491        | 0.2        | 0.1        | 0.2        | 0.9197        |
| Intake of antihypertensive drugs                      | 5        |            |            |            |               | 5.3        | 1.1        | 2          | 0.0791        | 5.2        | 1          | 2          | 0.0699        |
| Pulse pressure                                        | 4        |            |            |            |               | 4.4        | 1.1        | 2.1        | 0.0847        | 2.3        | 0.6        | 1.2        | 0.3286        |
| Diastolic BP                                          | 4        |            |            |            |               | 5.4        | 1.4        | 2.5        | 0.0392        | 5.3        | 1.3        | 2.6        | 0.0326        |
| Cholesterol ratio * Intake of antihypertensives drugs | 2        |            |            |            |               | 0.5        | 0.2        | 0.4        | 0.6562        | 0.1        | 0          | 0.1        | 0.9188        |
| Pulse pressure * Intake of antihypertensive drugs     | 2        |            |            |            |               | 1.4        | 0.7        | 1.3        | 0.2699        | 1.2        | 0.6        | 1.2        | 0.2924        |
| Diastolic BP * Antihypertensives                      | 2        |            |            |            |               | 3.2        | 1.6        | 3          | 0.0513        | 2.2        | 1.1        | 2.2        | 0.1128        |
| E/é                                                   | 2        |            |            |            |               |            |            |            |               | 8.9        | 4.5        | 8.9        | 0.0002        |
| E/A                                                   | 2        |            |            |            |               |            |            |            |               | 1          | 0.5        | 1          | 0.3676        |
| LAI                                                   | 2        |            |            |            |               |            |            |            |               | 1.3        | 0.6        | 1.2        | 0.2877        |
| Total                                                 | 55       | 39986.7    | 1289.9     | 2357.7     | < 0.0001      | 40431.7    | 825.1      | 1537.6     | < 0.0001      | 41486.1    | 754.3      | 1497.1     | < 0.0001      |
| Error                                                 | 744      | 446.4      | 0.5        |            |               | 423.4      | 0.5        |            |               | 374.9      | 0.5        |            |               |

*Supplementary Table 11: Analyses of variance of model 1, 2, and 3 of subcortical gray matter volume (complete case analyses). Tests included all interaction terms of the corresponding factor. E/A - ratio of early and late mitral inflow velocities in diastole. E/e' - ratio of early mitral inflow velocity and early mitral annular velocity in diastole.*

**Supplementary Table 12 – White Matter Volume (Complete Case Analysis)**

| Variable                                              | df       | model 1     |            |            |              | model 2     |             |            |               | model 3    |            |          |               |
|-------------------------------------------------------|----------|-------------|------------|------------|--------------|-------------|-------------|------------|---------------|------------|------------|----------|---------------|
|                                                       |          | SS          | MS         | F          | P            | SS          | MS          | F          | P             | SS         | MS         | F        | P             |
| Time interval                                         | 2        | 510.7       | 255.4      | 3.3        | 0.0357       | 419.1       | 209.5       | 2.7        | 0.0676        | 926.2      | 463.1      | 6.1      | 0.0023        |
| Baseline value of outcome                             | 2        | 738618      | 369309     | 4840.2     | < 0.0001     | 731893      | 365946.5    | 4720.3     | < 0.0001      | 712392.6   | 356196.3   | 4697.7   | < 0.0001      |
| Age                                                   | 4        | 18677.4     | 4669.4     | 61.2       | < 0.0001     | 15298.8     | 3824.7      | 49.3       | < 0.0001      | 11696.9    | 2924.2     | 38.6     | < 0.0001      |
| Sex                                                   | 3        | 2260        | 753.3      | 9.9        | < 0.0001     | 1479.4      | 493.1       | 6.4        | 0.0003        | 1127.7     | 375.9      | 5        | 0.0021        |
| Age * Sex                                             | 2        | 2204.1      | 1102       | 14.4       | < 0.0001     | 1475.4      | 737.7       | 9.5        | < 0.0001      | 1085.5     | 542.8      | 7.2      | 0.0008        |
| Intracranial Volume                                   | 2        | 459.5       | 229.7      | 3          | 0.0498       | 347.4       | 173.7       | 2.2        | 0.107         | 357.7      | 178.8      | 2.4      | 0.0953        |
| Body height                                           | 2        | 527.4       | 263.7      | 3.5        | 0.032        | 355.8       | 177.9       | 2.3        | 0.1015        | 518.5      | 259.3      | 3.4      | 0.0332        |
| Body weight                                           | 2        | 130.6       | 65.3       | 0.9        | 0.4254       | 53          | 26.5        | 0.3        | 0.7104        | 18.3       | 9.1        | 0.1      | 0.8864        |
| Years of education                                    | 2        | 92.7        | 46.3       | 0.6        | 0.5451       | 81.5        | 40.7        | 0.5        | 0.5914        | 69.9       | 35         | 0.5      | 0.6307        |
| Employment                                            | 3        | 375.1       | 125        | 1.6        | 0.1789       | 285.8       | 95.3        | 1.2        | 0.2982        | 230.5      | 76.8       | 1        | 0.3861        |
| Income                                                | 2        | 1151.3      | 575.6      | 7.5        | 0.0006       | 742.8       | 371.4       | 4.8        | 0.0085        | 418.9      | 209.5      | 2.8      | 0.0638        |
| Marital status                                        | 3        | 315.6       | 105.2      | 1.4        | 0.248        | 329.3       | 109.8       | 1.4        | 0.2368        | 385.5      | 128.5      | 1.7      | 0.1667        |
| Smoking status                                        | 2        | 38.6        | 19.3       | 0.3        | 0.7764       | 40.6        | 20.3        | 0.3        | 0.7699        | 62.7       | 31.3       | 0.4      | 0.6616        |
| Alcohol consumption                                   | 2        | 9.9         | 5          | 0.1        | 0.937        | 32.9        | 16.5        | 0.2        | 0.8089        | 62.5       | 31.2       | 0.4      | 0.6626        |
| <b>LVMl</b>                                           | <b>2</b> | <b>10.3</b> | <b>5.1</b> | <b>0.1</b> | <b>0.935</b> | <b>26.4</b> | <b>13.2</b> | <b>0.2</b> | <b>0.8437</b> | <b>2.4</b> | <b>1.2</b> | <b>0</b> | <b>0.9844</b> |
| Diabetes                                              | 1        |             |            |            |              | 647.9       | 647.9       | 8.4        | 0.0039        | 1233       | 1233       | 16.3     | < 0.0001      |
| Hypertension                                          | 1        |             |            |            |              | 23.6        | 23.6        | 0.3        | 0.5814        | 0.1        | 0.1        | 0        | 0.9731        |
| Waist to height ratio                                 | 2        |             |            |            |              | 113.6       | 56.8        | 0.7        | 0.4809        | 341.5      | 170.7      | 2.3      | 0.1059        |
| Cholesterol ratio                                     | 4        |             |            |            |              | 102.2       | 25.6        | 0.3        | 0.8581        | 49.3       | 12.3       | 0.2      | 0.9572        |
| Intake of lipidlowering drugs                         | 3        |             |            |            |              | 244.1       | 81.4        | 1          | 0.3699        | 209.9      | 70         | 0.9      | 0.4293        |
| Intake of antihypertensive drugs                      | 5        |             |            |            |              | 187.6       | 37.5        | 0.5        | 0.7883        | 370.8      | 74.2       | 1        | 0.4302        |
| Pulse pressure                                        | 4        |             |            |            |              | 261.2       | 65.3        | 0.8        | 0.4986        | 318        | 79.5       | 1        | 0.3811        |
| Diastolic BP                                          | 4        |             |            |            |              | 229.6       | 57.4        | 0.7        | 0.5645        | 723.3      | 180.8      | 2.4      | 0.0499        |
| Cholesterol ratio * Intake of antihypertensives drugs | 2        |             |            |            |              | 90.2        | 45.1        | 0.6        | 0.5593        | 42.9       | 21.4       | 0.3      | 0.7539        |
| Pulse pressure * Intake of antihypertensive drugs     | 2        |             |            |            |              | 73.8        | 36.9        | 0.5        | 0.6214        | 15.8       | 7.9        | 0.1      | 0.9011        |
| Diastolic BP * Antihypertensives                      | 2        |             |            |            |              | 30.3        | 15.1        | 0.2        | 0.8228        | 345.4      | 172.7      | 2.3      | 0.1032        |
| E/é                                                   | 2        |             |            |            |              |             |             |            |               | 42         | 21         | 0.3      | 0.7582        |
| E/A                                                   | 2        |             |            |            |              |             |             |            |               | 199.6      | 99.8       | 1.3      | 0.2688        |
| LAI                                                   | 2        |             |            |            |              |             |             |            |               | 107        | 53.5       | 0.7      | 0.4943        |
| Total                                                 | 55       | 4692191     | 151361     | 1983.8     | < 0.0001     | 4951006     | 101040.9    | 1303.3     | < 0.0001      | 4941698    | 89849      | 1185     | < 0.0001      |
| Error                                                 | 753      | 62489.7     | 76.3       |            |              | 62021       | 77.5        |            |               | 57095.2    | 75.8       |          |               |

*Supplementary Table 12: Analyses of variance of model 1, 2, and 3 of white matter volume (complete case analyses). Tests included all interaction terms of the corresponding factor. E/A - ratio of early and late mitral inflow velocities in diastole. E/e' - ratio of early mitral inflow velocity and early mitral annular velocity in diastole.*

**Supplementary Table 13 – White Matter Hyperintensities Volume (Complete Case Analysis)**

| Variable                                              | df       | model 1    |            |            |               | model 2    |            |            |               | model 3    |            |            |               |
|-------------------------------------------------------|----------|------------|------------|------------|---------------|------------|------------|------------|---------------|------------|------------|------------|---------------|
|                                                       |          | SS         | MS         | F          | P             | SS         | MS         | F          | P             | SS         | MS         | F          | P             |
| Time interval                                         | 2        | 0.4        | 0.2        | 0.3        | 0.7469        | 1.5        | 0.7        | 1          | 0.3705        | 1.1        | 0.5        | 0.8        | 0.4613        |
| Baseline value of outcome                             | 2        | 3028.7     | 1514.4     | 2002.4     | < 0.0001      | 2856.9     | 1428.5     | 1895.5     | < 0.0001      | 2571.7     | 1285.9     | 1828.4     | < 0.0001      |
| Age                                                   | 4        | 70.3       | 17.6       | 23.3       | < 0.0001      | 67.6       | 16.9       | 22.4       | < 0.0001      | 52.8       | 13.2       | 18.8       | < 0.0001      |
| Sex                                                   | 3        | 40.6       | 13.5       | 17.9       | < 0.0001      | 27.6       | 9.2        | 12.2       | < 0.0001      | 20.7       | 6.9        | 9.8        | < 0.0001      |
| Age * Sex                                             | 2        | 27.5       | 13.8       | 18.2       | < 0.0001      | 20.9       | 10.4       | 13.8       | < 0.0001      | 17         | 8.5        | 12.1       | < 0.0001      |
| Intracranial Volume                                   | 2        | 8.5        | 4.2        | 5.6        | 0.0038        | 11.5       | 5.8        | 7.6        | 0.0005        | 9.8        | 4.9        | 6.9        | 0.001         |
| Body height                                           | 2        | 2.9        | 1.5        | 1.9        | 0.1454        | 2.2        | 1.1        | 1.4        | 0.2407        | 3.3        | 1.6        | 2.3        | 0.0978        |
| Body weight                                           | 2        | 4.8        | 2.4        | 3.2        | 0.0414        | 0.8        | 0.4        | 0.5        | 0.5776        | 2.2        | 1.1        | 1.6        | 0.2084        |
| Years of education                                    | 2        | 0.1        | 0          | 0.1        | 0.944         | 1.1        | 0.6        | 0.7        | 0.4783        | 1.3        | 0.7        | 0.9        | 0.3939        |
| Employment                                            | 3        | 3.7        | 1.2        | 1.6        | 0.1845        | 3.9        | 1.3        | 1.7        | 0.1584        | 4          | 1.3        | 1.9        | 0.1287        |
| Income                                                | 2        | 2.1        | 1          | 1.4        | 0.2515        | 0.7        | 0.3        | 0.5        | 0.6322        | 1.2        | 0.6        | 0.8        | 0.441         |
| Marital status                                        | 3        | 3.8        | 1.3        | 1.7        | 0.1734        | 6.5        | 2.2        | 2.9        | 0.0356        | 5.5        | 1.8        | 2.6        | 0.0521        |
| Smoking status                                        | 2        | 7.2        | 3.6        | 4.8        | 0.0086        | 9.4        | 4.7        | 6.2        | 0.0021        | 13.4       | 6.7        | 9.5        | < 0.0001      |
| Alcohol consumption                                   | 2        | 3.3        | 1.6        | 2.2        | 0.1166        | 4.1        | 2.1        | 2.7        | 0.0658        | 4.1        | 2          | 2.9        | 0.0555        |
| <b>LVMl</b>                                           | <b>2</b> | <b>3.3</b> | <b>1.6</b> | <b>2.2</b> | <b>0.1161</b> | <b>2.5</b> | <b>1.3</b> | <b>1.7</b> | <b>0.1851</b> | <b>2.9</b> | <b>1.5</b> | <b>2.1</b> | <b>0.1251</b> |
| Diabetes                                              | 1        |            |            |            |               | 3.9        | 3.9        | 5.2        | 0.0232        | 3.7        | 3.7        | 5.2        | 0.0224        |
| Hypertension                                          | 1        |            |            |            |               | 0.1        | 0.1        | 0.1        | 0.7315        | 0.6        | 0.6        | 0.9        | 0.338         |
| Waist to height ratio                                 | 2        |            |            |            |               | 0.2        | 0.1        | 0.1        | 0.8704        | 1.7        | 0.8        | 1.2        | 0.301         |
| Cholesterol ratio                                     | 4        |            |            |            |               | 5.5        | 1.4        | 1.8        | 0.1217        | 6.9        | 1.7        | 2.4        | 0.0458        |
| Intake of lipidlowering drugs                         | 3        |            |            |            |               | 7.8        | 2.6        | 3.5        | 0.0162        | 11         | 3.7        | 5.2        | 0.0014        |
| Intake of antihypertensive drugs                      | 5        |            |            |            |               | 0.9        | 0.2        | 0.2        | 0.9514        | 0.7        | 0.1        | 0.2        | 0.962         |
| Pulse pressure                                        | 4        |            |            |            |               | 4.2        | 1          | 1.4        | 0.235         | 4.6        | 1.2        | 1.6        | 0.163         |
| Diastolic BP                                          | 4        |            |            |            |               | 5.1        | 1.3        | 1.7        | 0.1492        | 5.4        | 1.3        | 1.9        | 0.1067        |
| Cholesterol ratio * Intake of antihypertensives drugs | 2        |            |            |            |               | 4.2        | 2.1        | 2.8        | 0.0629        | 6.5        | 3.3        | 4.6        | 0.01          |
| Pulse pressure * Intake of antihypertensive drugs     | 2        |            |            |            |               | 0.3        | 0.1        | 0.2        | 0.8327        | 0.1        | 0.1        | 0.1        | 0.9042        |
| Diastolic BP * Antihypertensives                      | 2        |            |            |            |               | 0.7        | 0.3        | 0.4        | 0.643         | 0.3        | 0.1        | 0.2        | 0.8089        |
| E/é                                                   | 2        |            |            |            |               |            |            |            |               | 6.6        | 3.3        | 4.7        | 0.0092        |
| E/A                                                   | 2        |            |            |            |               |            |            |            |               | 0          | 0          | 0          | 0.9858        |
| LAI                                                   | 2        |            |            |            |               |            |            |            |               | 7.8        | 3.9        | 5.5        | 0.0041        |
| Total                                                 | 55       | 15048.7    | 485.4      | 641.9      | < 0.0001      | 14376.3    | 293.4      | 389.3      | < 0.0001      | 14186.3    | 257.9      | 366.8      | < 0.0001      |
| Error                                                 | 748      | 615.6      | 0.8        |            |               | 598.4      | 0.8        |            |               | 526        | 0.7        |            |               |

*Supplementary Table 13: Analyses of variance of model 1, 2, and 3 of white matter hyperintensities volume (complete case analyses). Tests included all interaction terms of the corresponding factor. E/A - ratio of early and late mitral inflow velocities in diastole. E/e' - ratio of early mitral inflow velocity and early mitral annular velocity in diastole.*

**Supplementary Table 14 – Global Cortical Thickness (Complete Case Analysis)**

| Variable                                              | df       | model 1       |               |            |               | model 2       |               |            |               | model 3      |               |            |               |
|-------------------------------------------------------|----------|---------------|---------------|------------|---------------|---------------|---------------|------------|---------------|--------------|---------------|------------|---------------|
|                                                       |          | SS            | MS            | F          | P             | SS            | MS            | F          | P             | SS           | MS            | F          | P             |
| Time interval                                         | 2        | 0.0009        | 0.0004        | 0.3        | 0.7095        | 0.0015        | 0.0008        | 0.6        | 0.5402        | 0.0041       | 0.0021        | 1.8        | 0.1665        |
| Baseline value of outcome                             | 2        | 5.9711        | 2.9855        | 2329.3     | < 0.0001      | 5.14          | 2.57          | 2084.6     | < 0.0001      | 5.5916       | 2.7958        | 2430.2     | < 0.0001      |
| Age                                                   | 4        | 0.0651        | 0.0163        | 12.7       | < 0.0001      | 0.0492        | 0.0123        | 10         | < 0.0001      | 0.0424       | 0.0106        | 9.2        | < 0.0001      |
| Sex                                                   | 3        | 0.0035        | 0.0012        | 0.9        | 0.439         | 0.0063        | 0.0021        | 1.7        | 0.1645        | 0.0206       | 0.0069        | 6          | 0.0005        |
| Age * Sex                                             | 2        | 0.0016        | 0.0008        | 0.6        | 0.5388        | 0.0042        | 0.0021        | 1.7        | 0.1796        | 0.0141       | 0.007         | 6.1        | 0.0023        |
| Intracranial Volume                                   | 2        | 0.0034        | 0.0017        | 1.3        | 0.2662        | 0.0035        | 0.0017        | 1.4        | 0.2434        | 0.005        | 0.0025        | 2.2        | 0.1143        |
| Body height                                           | 2        | 0.0054        | 0.0027        | 2.1        | 0.1217        | 0.0021        | 0.001         | 0.8        | 0.4344        | 0.0054       | 0.0027        | 2.4        | 0.095         |
| Body weight                                           | 2        | 0.0012        | 0.0006        | 0.5        | 0.616         | 0.0018        | 0.0009        | 0.7        | 0.4792        | 0.0008       | 0.0004        | 0.4        | 0.6993        |
| Years of education                                    | 2        | 0.0046        | 0.0023        | 1.8        | 0.1679        | 0.003         | 0.0015        | 1.2        | 0.2938        | 0.002        | 0.001         | 0.9        | 0.4166        |
| Employment                                            | 3        | 0.0015        | 0.0005        | 0.4        | 0.7566        | 0.0042        | 0.0014        | 1.1        | 0.3356        | 0.0027       | 0.0009        | 0.8        | 0.5025        |
| Income                                                | 2        | 0.0001        | 0.0001        | 0.1        | 0.9456        | 0.0009        | 0.0005        | 0.4        | 0.6891        | 0.0001       | 0             | 0          | 0.9662        |
| Marital status                                        | 3        | 0.0121        | 0.004         | 3.1        | 0.0247        | 0.0061        | 0.002         | 1.6        | 0.1775        | 0.0112       | 0.0037        | 3.2        | 0.0218        |
| Smoking status                                        | 2        | 0.0071        | 0.0036        | 2.8        | 0.0628        | 0.0071        | 0.0036        | 2.9        | 0.0558        | 0.0066       | 0.0033        | 2.9        | 0.0579        |
| Alcohol consumption                                   | 2        | 0.0101        | 0.005         | 3.9        | 0.0199        | 0.0062        | 0.0031        | 2.5        | 0.0813        | 0.01         | 0.005         | 4.3        | 0.0133        |
| <b>LVMl</b>                                           | <b>2</b> | <b>0.0203</b> | <b>0.0101</b> | <b>7.9</b> | <b>0.0004</b> | <b>0.0178</b> | <b>0.0089</b> | <b>7.2</b> | <b>0.0008</b> | <b>0.015</b> | <b>0.0075</b> | <b>6.5</b> | <b>0.0016</b> |
| Diabetes                                              | 1        |               |               |            |               | 0.007         | 0.007         | 5.7        | 0.0175        | 0.0132       | 0.0132        | 11.5       | 0.0007        |
| Hypertension                                          | 1        |               |               |            |               | 0.0026        | 0.0026        | 2.1        | 0.1505        | 0.0035       | 0.0035        | 3.1        | 0.0805        |
| Waist to height ratio                                 | 2        |               |               |            |               | 0.0126        | 0.0063        | 5.1        | 0.0062        | 0.0075       | 0.0037        | 3.3        | 0.039         |
| Cholesterol ratio                                     | 4        |               |               |            |               | 0.004         | 0.001         | 0.8        | 0.5151        | 0.0079       | 0.002         | 1.7        | 0.1464        |
| Intake of lipidlowering drugs                         | 3        |               |               |            |               | 0.0013        | 0.0004        | 0.4        | 0.7795        | 0.0048       | 0.0016        | 1.4        | 0.2415        |
| Intake of antihypertensive drugs                      | 5        |               |               |            |               | 0.0037        | 0.0007        | 0.6        | 0.6985        | 0.0016       | 0.0003        | 0.3        | 0.9293        |
| Pulse pressure                                        | 4        |               |               |            |               | 0.0019        | 0.0005        | 0.4        | 0.8224        | 0.0055       | 0.0014        | 1.2        | 0.3121        |
| Diastolic BP                                          | 4        |               |               |            |               | 0.0029        | 0.0007        | 0.6        | 0.6729        | 0.0011       | 0.0003        | 0.2        | 0.9215        |
| Cholesterol ratio * Intake of antihypertensives drugs | 2        |               |               |            |               | 0.0006        | 0.0003        | 0.2        | 0.7796        | 0.0038       | 0.0019        | 1.7        | 0.1913        |
| Pulse pressure * Intake of antihypertensive drugs     | 2        |               |               |            |               | 0.0005        | 0.0002        | 0.2        | 0.832         | 0.0006       | 0.0003        | 0.2        | 0.7858        |
| Diastolic BP * Antihypertensives                      | 2        |               |               |            |               | 0.0029        | 0.0014        | 1.2        | 0.3134        | 0.0008       | 0.0004        | 0.4        | 0.6995        |
| E/é                                                   | 2        |               |               |            |               |               |               |            |               | 0.0034       | 0.0017        | 1.5        | 0.2322        |
| E/A                                                   | 2        |               |               |            |               |               |               |            |               | 0.001        | 0.0005        | 0.4        | 0.6498        |
| LAI                                                   | 2        |               |               |            |               |               |               |            |               | 0.0011       | 0.0005        | 0.5        | 0.622         |
| Total                                                 | 55       | 24.6651       | 0.7956        | 620.8      | < 0.0001      | 23.9489       | 0.4888        | 396.4      | < 0.0001      | 29.2233      | 0.5313        | 461.9      | < 0.0001      |
| Error                                                 | 749      | 1.0549        | 0.0013        |            |               | 0.9801        | 0.0012        |            |               | 0.8617       | 0.0012        |            |               |

*Supplementary Table 14: Analyses of variance of model 1, 2, and 3 of global cortical thickness (complete case analyses). Tests included all interaction terms of the corresponding factor. E/A - ratio of early and late mitral inflow velocities in diastole. E/e' - ratio of early mitral inflow velocity and early mitral annular velocity in diastole.*

**Supplementary Table 15 – Cortical Brain Age (Complete Case Analysis)**

| Variable                                           | df       | model 1      |              |            |               | model 2      |              |             |                    | model 3    |              |             |                    |
|----------------------------------------------------|----------|--------------|--------------|------------|---------------|--------------|--------------|-------------|--------------------|------------|--------------|-------------|--------------------|
|                                                    |          | SS           | MS           | F          | P             | SS           | MS           | F           | P                  | SS         | MS           | F           | P                  |
| Time interval                                      | 2        | 184.7        | 92.4         | 3.2        | 0.043         | 438.9        | 219.4        | 7.8         | 0.0005             | 258.4      | 129.2        | 4.6         | 0.0104             |
| Baseline value of outcome                          | 2        | 57838.8      | 28919.4      | 988.8      | < 0.0001      | 60301        | 30150.5      | 1066.8      | < 0.0001           | 57610.5    | 28805.2      | 1023.4      | < 0.0001           |
| Age                                                | 4        | 1212.6       | 303.2        | 10.4       | < 0.0001      | 928.6        | 232.2        | 8.2         | < 0.0001           | 775        | 193.7        | 6.9         | < 0.0001           |
| Sex                                                | 3        | 700          | 233.3        | 8          | < 0.0001      | 709.3        | 236.4        | 8.4         | < 0.0001           | 600.4      | 200.1        | 7.1         | 0.0001             |
| Age * Sex                                          | 2        | 663.2        | 331.6        | 11.3       | < 0.0001      | 686.3        | 343.1        | 12.1        | < 0.0001           | 583.6      | 291.8        | 10.4        | < 0.0001           |
| Intracranial Volume                                | 2        | 167.7        | 83.9         | 2.9        | 0.0574        | 260.9        | 130.4        | 4.6         | 0.0102             | 65.3       | 32.6         | 1.2         | 0.3143             |
| Body height                                        | 2        | 4.8          | 2.4          | 0.1        | 0.9206        | 8.2          | 4.1          | 0.1         | 0.865              | 16         | 8            | 0.3         | 0.7524             |
| Body weight                                        | 2        | 25.8         | 12.9         | 0.4        | 0.6434        | 29.8         | 14.9         | 0.5         | 0.5907             | 12.6       | 6.3          | 0.2         | 0.7999             |
| Years of education                                 | 2        | 29.5         | 14.7         | 0.5        | 0.6045        | 66.8         | 33.4         | 1.2         | 0.3074             | 16.6       | 8.3          | 0.3         | 0.7454             |
| Employment                                         | 3        | 76.2         | 25.4         | 0.9        | 0.4568        | 66.3         | 22.1         | 0.8         | 0.5042             | 33.7       | 11.2         | 0.4         | 0.7541             |
| Income                                             | 2        | 13.8         | 6.9          | 0.2        | 0.7895        | 11.1         | 5.6          | 0.2         | 0.8217             | 17.2       | 8.6          | 0.3         | 0.7371             |
| Marital status                                     | 3        | 130.2        | 43.4         | 1.5        | 0.2176        | 80.2         | 26.7         | 0.9         | 0.4178             | 103.5      | 34.5         | 1.2         | 0.2993             |
| Smoking status                                     | 2        | 553.8        | 276.9        | 9.5        | < 0.0001      | 334.7        | 167.4        | 5.9         | 0.0028             | 450        | 225          | 8           | 0.0004             |
| Alcohol consumption                                | 2        | 117.7        | 58.9         | 2          | 0.1343        | 158.4        | 79.2         | 2.8         | 0.0612             | 156.1      | 78           | 2.8         | 0.0631             |
| <b>LVMl</b>                                        | <b>2</b> | <b>446.5</b> | <b>223.2</b> | <b>7.6</b> | <b>0.0005</b> | <b>699.5</b> | <b>349.8</b> | <b>12.4</b> | <b>&lt; 0.0001</b> | <b>579</b> | <b>289.5</b> | <b>10.3</b> | <b>&lt; 0.0001</b> |
| Diabetes                                           | 1        |              |              |            |               | 278.5        | 278.5        | 9.9         | 0.0018             | 286.8      | 286.8        | 10.2        | 0.0015             |
| Hypertension                                       | 1        |              |              |            |               | 11.5         | 11.5         | 0.4         | 0.5234             | 13.4       | 13.4         | 0.5         | 0.4908             |
| Waist to height ratio                              | 2        |              |              |            |               | 140.9        | 70.5         | 2.5         | 0.0833             | 55.6       | 27.8         | 1           | 0.3731             |
| Cholesterol ratio                                  | 4        |              |              |            |               | 495.5        | 123.9        | 4.4         | 0.0016             | 341.8      | 85.5         | 3           | 0.0169             |
| Intake of lipid-lowering drugs                     | 3        |              |              |            |               | 104.4        | 34.8         | 1.2         | 0.2971             | 49.5       | 16.5         | 0.6         | 0.6241             |
| Intake of antihypertensive drugs                   | 5        |              |              |            |               | 776          | 155.2        | 5.5         | < 0.0001           | 827.1      | 165.4        | 5.9         | < 0.0001           |
| Pulse pressure                                     | 4        |              |              |            |               | 823.3        | 205.8        | 7.3         | < 0.0001           | 850.1      | 212.5        | 7.6         | < 0.0001           |
| Diastolic BP                                       | 4        |              |              |            |               | 169.8        | 42.5         | 1.5         | 0.1996             | 122.7      | 30.7         | 1.1         | 0.3603             |
| Cholesterol ratio * Intake of lipid-lowering drugs | 2        |              |              |            |               | 102.4        | 51.2         | 1.8         | 0.1641             | 47.7       | 23.9         | 0.8         | 0.4289             |
| Pulse pressure * Intake of antihypertensive drugs  | 2        |              |              |            |               | 598.8        | 299.4        | 10.6        | < 0.0001           | 689.3      | 344.6        | 12.2        | < 0.0001           |
| Diastolic BP * Intake of antihypertensive drugs    | 2        |              |              |            |               | 39.9         | 19.9         | 0.7         | 0.4943             | 15.7       | 7.9          | 0.3         | 0.7563             |
| E/é                                                | 2        |              |              |            |               | 0            | 0            |             |                    | 10.2       | 5.1          | 0.2         | 0.8343             |
| E/A                                                | 2        |              |              |            |               | 0            | 0            |             |                    | 63.2       | 31.6         | 1.1         | 0.3259             |
| LAI                                                | 2        |              |              |            |               | 0            | 0            |             |                    | 15.4       | 7.7          | 0.3         | 0.7608             |
| Total                                              | 55       | 373088.7     | 12035.1      | 411.5      | < 0.0001      | 521847       | 10649.9      | 376.8       | < 0.0001           | 496751.9   | 9031.9       | 320.9       | < 0.0001           |
| Error                                              | 746      | 23544.8      | 29.2         |            |               | 22326.8      | 28.3         |             |                    | 20998.3    | 28.1         |             |                    |

*Supplementary Table 15: Analyses of variance of model 1, 2, and 3 of cortical brain age (complete case analyses). Tests included all interaction terms of the corresponding factor. E/A - ratio of early and late mitral inflow velocities in diastole. E/e' - ratio of early mitral inflow velocity and early mitral annular velocity in diastole.*

**Supplementary Table 16 – Subcortical Brain Age (Complete Case Analysis)**

| Variable                                           | df       | model 1     |             |            |               | model 2     |             |            |               | model 3     |             |            |               |
|----------------------------------------------------|----------|-------------|-------------|------------|---------------|-------------|-------------|------------|---------------|-------------|-------------|------------|---------------|
|                                                    |          | SS          | MS          | F          | P             | SS          | MS          | F          | P             | SS          | MS          | F          | P             |
| Time interval                                      | 2        | 365.3       | 182.6       | 9.3        | 0.0001        | 344.8       | 172.4       | 8.7        | 0.0002        | 426.7       | 213.4       | 10.9       | < 0.0001      |
| Baseline value of outcome                          | 2        | 97568.8     | 48784.4     | 2474.9     | < 0.0001      | 92358       | 46179       | 2340.4     | < 0.0001      | 86311.2     | 43155.6     | 2200.2     | < 0.0001      |
| Age                                                | 4        | 1582.3      | 395.6       | 20.1       | < 0.0001      | 1590.9      | 397.7       | 20.2       | < 0.0001      | 1098.3      | 274.6       | 14         | < 0.0001      |
| Sex                                                | 3        | 213.7       | 71.2        | 3.6        | 0.013         | 96.9        | 32.3        | 1.6        | 0.1794        | 72.5        | 24.2        | 1.2        | 0.297         |
| Age * Sex                                          | 2        | 40.2        | 20.1        | 1          | 0.361         | 13.1        | 6.5         | 0.3        | 0.7179        | 18.1        | 9.1         | 0.5        | 0.6299        |
| Intracranial Volume                                | 2        | 314.5       | 157.3       | 8          | 0.0004        | 261.4       | 130.7       | 6.6        | 0.0014        | 299.7       | 149.8       | 7.6        | 0.0005        |
| Body height                                        | 2        | 30          | 15          | 0.8        | 0.468         | 52.6        | 26.3        | 1.3        | 0.264         | 52.4        | 26.2        | 1.3        | 0.2636        |
| Body weight                                        | 2        | 25.3        | 12.7        | 0.6        | 0.526         | 12.9        | 6.5         | 0.3        | 0.7209        | 13.7        | 6.9         | 0.4        | 0.7047        |
| Years of education                                 | 2        | 20.6        | 10.3        | 0.5        | 0.5939        | 31.5        | 15.7        | 0.8        | 0.4506        | 14.9        | 7.5         | 0.4        | 0.6838        |
| Employment                                         | 3        | 51.2        | 17.1        | 0.9        | 0.4587        | 123.7       | 41.2        | 2.1        | 0.1002        | 159.1       | 53          | 2.7        | 0.0445        |
| Income                                             | 2        | 15          | 7.5         | 0.4        | 0.6834        | 27.1        | 13.6        | 0.7        | 0.5035        | 11.8        | 5.9         | 0.3        | 0.7399        |
| Marital status                                     | 3        | 376.1       | 125.4       | 6.4        | 0.0003        | 78.6        | 26.2        | 1.3        | 0.2639        | 199.1       | 66.4        | 3.4        | 0.0178        |
| Smoking status                                     | 2        | 82          | 41          | 2.1        | 0.1257        | 125.6       | 62.8        | 3.2        | 0.042         | 141.2       | 70.6        | 3.6        | 0.0278        |
| Alcohol consumption                                | 2        | 144.9       | 72.5        | 3.7        | 0.0257        | 157.1       | 78.5        | 4          | 0.0191        | 199.1       | 99.5        | 5.1        | 0.0065        |
| <b>LVMl</b>                                        | <b>2</b> | <b>35.7</b> | <b>17.9</b> | <b>0.9</b> | <b>0.4043</b> | <b>28.4</b> | <b>14.2</b> | <b>0.7</b> | <b>0.4876</b> | <b>31.7</b> | <b>15.8</b> | <b>0.8</b> | <b>0.4462</b> |
| Diabetes                                           | 1        |             |             |            |               | 0.1         | 0.1         | 0          | 0.9323        | 0.1         | 0.1         | 0          | 0.9575        |
| Hypertension                                       | 1        |             |             |            |               | 2.5         | 2.5         | 0.1        | 0.7213        | 0.5         | 0.5         | 0          | 0.872         |
| Waist to height ratio                              | 2        |             |             |            |               | 34.6        | 17.3        | 0.9        | 0.4168        | 29.6        | 14.8        | 0.8        | 0.47          |
| Cholesterol ratio                                  | 4        |             |             |            |               | 54.7        | 13.7        | 0.7        | 0.5966        | 50.7        | 12.7        | 0.6        | 0.6296        |
| Intake of lipid-lowering drugs                     | 3        |             |             |            |               | 17.7        | 5.9         | 0.3        | 0.8259        | 18.7        | 6.2         | 0.3        | 0.8119        |
| Intake of antihypertensive drugs                   | 5        |             |             |            |               | 138.4       | 27.7        | 1.4        | 0.2211        | 114.3       | 22.9        | 1.2        | 0.3243        |
| Pulse pressure                                     | 4        |             |             |            |               | 63.8        | 16          | 0.8        | 0.5198        | 104.2       | 26.1        | 1.3        | 0.2576        |
| Diastolic BP                                       | 4        |             |             |            |               | 260.4       | 65.1        | 3.3        | 0.0108        | 203.3       | 50.8        | 2.6        | 0.0355        |
| Cholesterol ratio * Intake of lipid-lowering drugs | 2        |             |             |            |               | 15.7        | 7.9         | 0.4        | 0.6712        | 18          | 9           | 0.5        | 0.6326        |
| Pulse pressure * Intake of antihypertensive drugs  | 2        |             |             |            |               | 45.8        | 22.9        | 1.2        | 0.3142        | 53.3        | 26.6        | 1.4        | 0.2578        |
| Diastolic BP * Intake of antihypertensive drugs    | 2        |             |             |            |               | 71.7        | 35.8        | 1.8        | 0.1634        | 40.5        | 20.3        | 1          | 0.3564        |
| E/é                                                | 2        |             |             |            |               | 0           | 0           |            |               | 114.1       | 57.1        | 2.9        | 0.0552        |
| E/A                                                | 2        |             |             |            |               | 0           | 0           |            |               | 2.4         | 1.2         | 0.1        | 0.9405        |
| LAI                                                | 2        |             |             |            |               | 0           | 0           |            |               | 8           | 4           | 0.2        | 0.816         |
| Total                                              | 55       | 550920.1    | 17771.6     | 901.6      | < 0.0001      | 569771.4    | 11628       | 589.3      | < 0.0001      | 597688.8    | 10867.1     | 554        | < 0.0001      |
| Error                                              | 748      | 15966.3     | 19.7        |            |               | 15568.1     | 19.7        |            |               | 14671.4     | 19.6        |            |               |

*Supplementary Table 16: Analyses of variance of model 1, 2, and 3 of subcortical brain age (complete case analyses). Tests included all interaction terms of the corresponding factor. E/A - ratio of early and late mitral inflow velocities in diastole. E/e' - ratio of early mitral inflow velocity and early mitral annular velocity in diastole.*



**Supplementary Table 17 – Brain Age (Complete Case Analysis)**

| Variable                                           | df       | model 1     |             |            |               | model 2     |             |            |               | model 3     |             |            |               |
|----------------------------------------------------|----------|-------------|-------------|------------|---------------|-------------|-------------|------------|---------------|-------------|-------------|------------|---------------|
|                                                    |          | SS          | MS          | F          | P             | SS          | MS          | F          | P             | SS          | MS          | F          | P             |
| Time interval                                      | 2        | 116         | 58          | 6.3        | 0.0018        | 72.8        | 36.4        | 4          | 0.0183        | 87.5        | 43.7        | 5.2        | 0.0059        |
| Baseline value of outcome                          | 2        | 18005.2     | 9002.6      | 985.3      | < 0.0001      | 17653.6     | 8826.8      | 974.3      | < 0.0001      | 16989.2     | 8494.6      | 1002.5     | < 0.0001      |
| Age                                                | 4        | 497.2       | 124.3       | 13.6       | < 0.0001      | 380         | 95          | 10.5       | < 0.0001      | 380.2       | 95.1        | 11.2       | < 0.0001      |
| Sex                                                | 3        | 59.4        | 19.8        | 2.2        | 0.0903        | 81.5        | 27.2        | 3          | 0.0299        | 135.4       | 45.1        | 5.3        | 0.0012        |
| Age * Sex                                          | 2        | 58.5        | 29.3        | 3.2        | 0.0411        | 81.1        | 40.6        | 4.5        | 0.0117        | 128         | 64          | 7.6        | 0.0006        |
| Intracranial Volume                                | 2        | 38.4        | 19.2        | 2.1        | 0.123         | 75.2        | 37.6        | 4.2        | 0.0161        | 46          | 23          | 2.7        | 0.0668        |
| Body height                                        | 2        | 3.2         | 1.6         | 0.2        | 0.8416        | 2.3         | 1.2         | 0.1        | 0.879         | 7.7         | 3.8         | 0.5        | 0.6355        |
| Body weight                                        | 2        | 4.3         | 2.1         | 0.2        | 0.7918        | 18.6        | 9.3         | 1          | 0.3586        | 6.5         | 3.2         | 0.4        | 0.682         |
| Years of education                                 | 2        | 73.7        | 36.8        | 4          | 0.0181        | 77.9        | 39          | 4.3        | 0.0139        | 18.5        | 9.2         | 1.1        | 0.337         |
| Employment                                         | 3        | 27.7        | 9.2         | 1          | 0.3875        | 15.2        | 5.1         | 0.6        | 0.6427        | 42.1        | 14          | 1.7        | 0.1752        |
| Income                                             | 2        | 11.7        | 5.9         | 0.6        | 0.5264        | 5.4         | 2.7         | 0.3        | 0.7415        | 9.3         | 4.6         | 0.5        | 0.578         |
| Marital status                                     | 3        | 90.2        | 30.1        | 3.3        | 0.0201        | 70.4        | 23.5        | 2.6        | 0.0517        | 27.5        | 9.2         | 1.1        | 0.3566        |
| Smoking status                                     | 2        | 100         | 50          | 5.5        | 0.0044        | 158.2       | 79.1        | 8.7        | 0.0002        | 179.4       | 89.7        | 10.6       | < 0.0001      |
| Alcohol consumption                                | 2        | 5.3         | 2.6         | 0.3        | 0.7497        | 44.4        | 22.2        | 2.5        | 0.0868        | 66.6        | 33.3        | 3.9        | 0.02          |
| <b>LVMl</b>                                        | <b>2</b> | <b>64.7</b> | <b>32.4</b> | <b>3.5</b> | <b>0.0294</b> | <b>50.9</b> | <b>25.5</b> | <b>2.8</b> | <b>0.0607</b> | <b>56.2</b> | <b>28.1</b> | <b>3.3</b> | <b>0.0368</b> |
| Diabetes                                           | 1        |             |             |            |               | 0.9         | 0.9         | 0.1        | 0.7563        | 9.9         | 9.9         | 1.2        | 0.279         |
| Hypertension                                       | 1        |             |             |            |               | 0.2         | 0.2         | 0          | 0.8784        | 0.4         | 0.4         | 0.1        | 0.8231        |
| Waist to height ratio                              | 2        |             |             |            |               | 1.5         | 0.7         | 0.1        | 0.9224        | 27.4        | 13.7        | 1.6        | 0.1995        |
| Cholesterol ratio                                  | 4        |             |             |            |               | 34.1        | 8.5         | 0.9        | 0.4389        | 30.2        | 7.5         | 0.9        | 0.469         |
| Intake of lipid-lowering drugs                     | 3        |             |             |            |               | 0.3         | 0.1         | 0          | 0.9982        | 9.4         | 3.1         | 0.4        | 0.7755        |
| Intake of antihypertensive drugs                   | 5        |             |             |            |               | 146.3       | 29.3        | 3.2        | 0.0068        | 95.2        | 19          | 2.2        | 0.048         |
| Pulse pressure                                     | 4        |             |             |            |               | 257.1       | 64.3        | 7.1        | < 0.0001      | 143.8       | 36          | 4.2        | 0.0021        |
| Diastolic BP                                       | 4        |             |             |            |               | 89.1        | 22.3        | 2.5        | 0.0442        | 45.8        | 11.5        | 1.4        | 0.2488        |
| Cholesterol ratio * Intake of lipid-lowering drugs | 2        |             |             |            |               | 0.2         | 0.1         | 0          | 0.9914        | 9.3         | 4.7         | 0.6        | 0.5768        |
| Pulse pressure * Intake of antihypertensive drugs  | 2        |             |             |            |               | 133.1       | 66.6        | 7.3        | 0.0007        | 91.8        | 45.9        | 5.4        | 0.0046        |
| Diastolic BP * Intake of antihypertensive drugs    | 2        |             |             |            |               | 6.1         | 3           | 0.3        | 0.7145        | 3.4         | 1.7         | 0.2        | 0.8174        |
| E/é                                                | 2        |             |             |            |               | 0           | 0           |            |               | 66.5        | 33.3        | 3.9        | 0.0202        |
| E/A                                                | 2        |             |             |            |               | 0           | 0           |            |               | 54.8        | 27.4        | 3.2        | 0.0401        |
| LAI                                                | 2        |             |             |            |               | 0           | 0           |            |               | 53.2        | 26.6        | 3.1        | 0.044         |
| Total                                              | 55       | 232205.3    | 7490.5      | 819.8      | < 0.0001      | 259642.7    | 5298.8      | 584.9      | < 0.0001      | 259068.5    | 4710.3      | 555.9      | < 0.0001      |
| Error                                              | 747      | 7409.7      | 9.1         |            |               | 7184.3      | 9.1         |            |               | 6329.8      | 8.5         |            |               |

*Supplementary Table 17: Analyses of variance of model 1, 2, and 3 of brain age (complete case analyses). Tests included all interaction terms of the corresponding factor. E/A - ratio of early and late mitral inflow velocities in diastole. E/e' - ratio of early mitral inflow velocity and early mitral annular velocity in diastole.*
